# Supplementary material for: Integrative Metabolomics Reveals Deep Tissue and Systemic Metabolic Remodeling in Glioblastoma
Source: MDPI journal article supplement (doi:10.3390/cancers13205157), 2021-10-14
Supplement: s1 [file s1]

# Supplementary material: Integrative Metabolomics Reveals Deep Tissue and Systemic Metabolic Remodeling in Glioblastoma

Vianney Gilard, Justine Ferey, Florent Marguet, Maxime Fontanilles, Franklin Ducatez, Carine Pilon, Céline Lesueur, Tony Pereira, Carole Basset, Isabelle Schmitz-Afonso, Frédéric Di Fioré, Annie Laquerrière, Carlos Afonso, Stéphane Derrey, Stéphane Marret, Soumeia Bekri and Abdellah Tebani

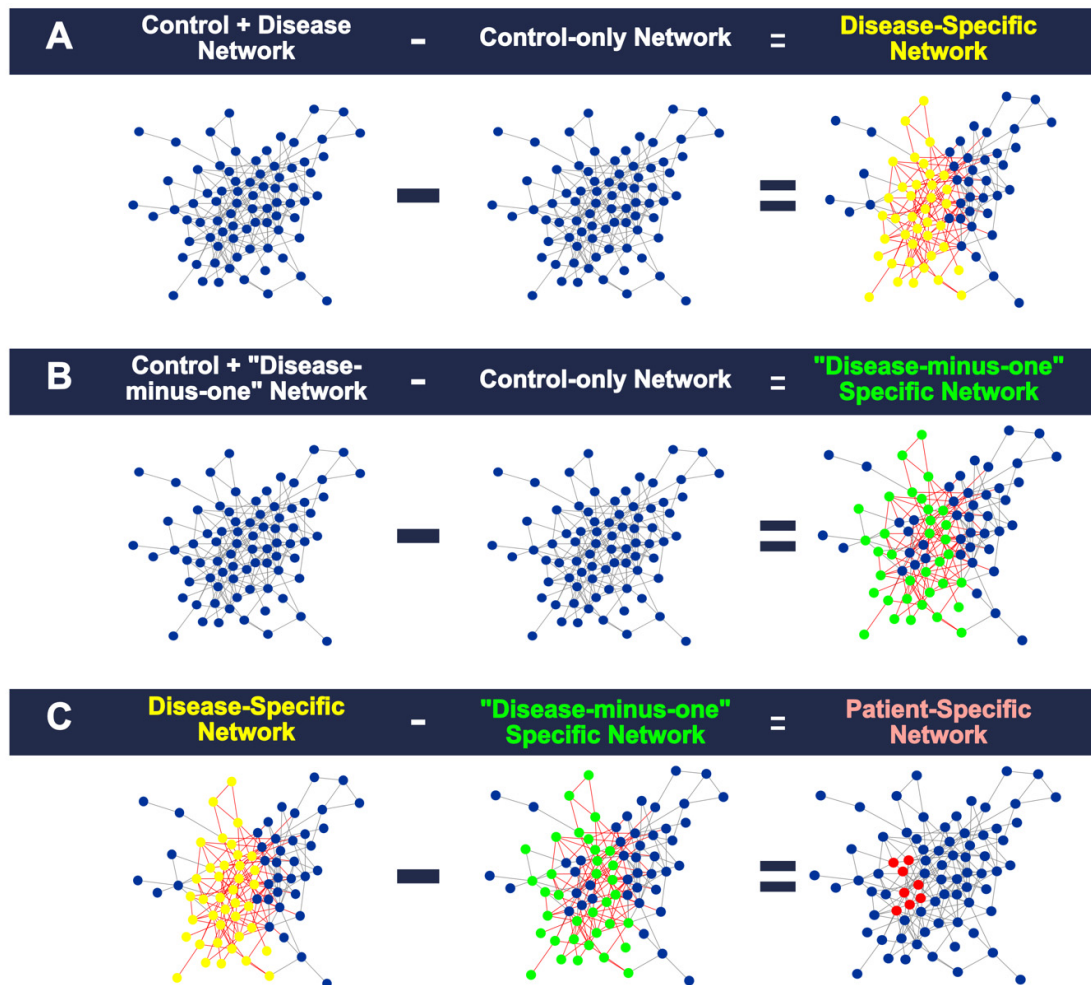

**Figure S1.** Network analysis overview. Networks are built using Partial Correlation. The first network ("disease-control" network) is learned from disease profiles and control profiles. A second network composed of only control ("control-only" network). A third network is composed of control profiles and disease excluding one patient at a time ("Disease-minus-one" network). This third network is built iteratively to cover all the patients. A final pruning stage subtracts edges from the disease-control network that are also found either in A) the control-only network, outputting the disease-specific network B) "Disease-minus-one" specific network or C) Patient-specific network.

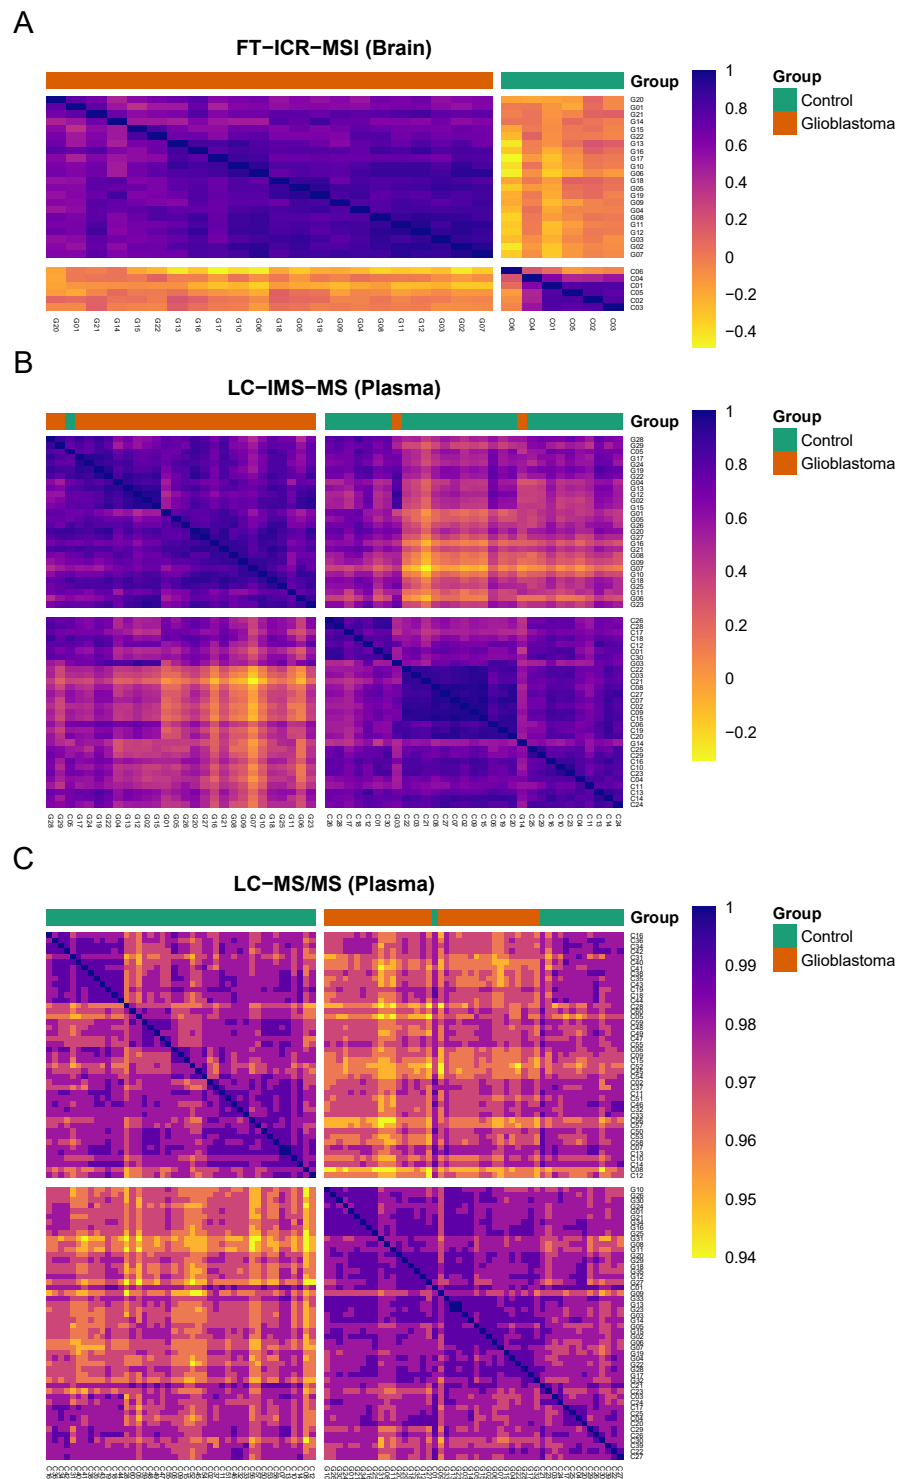

Figure S2. Spearman correlations between samples.

# Glioblastoma – Previously Reported Metabolites

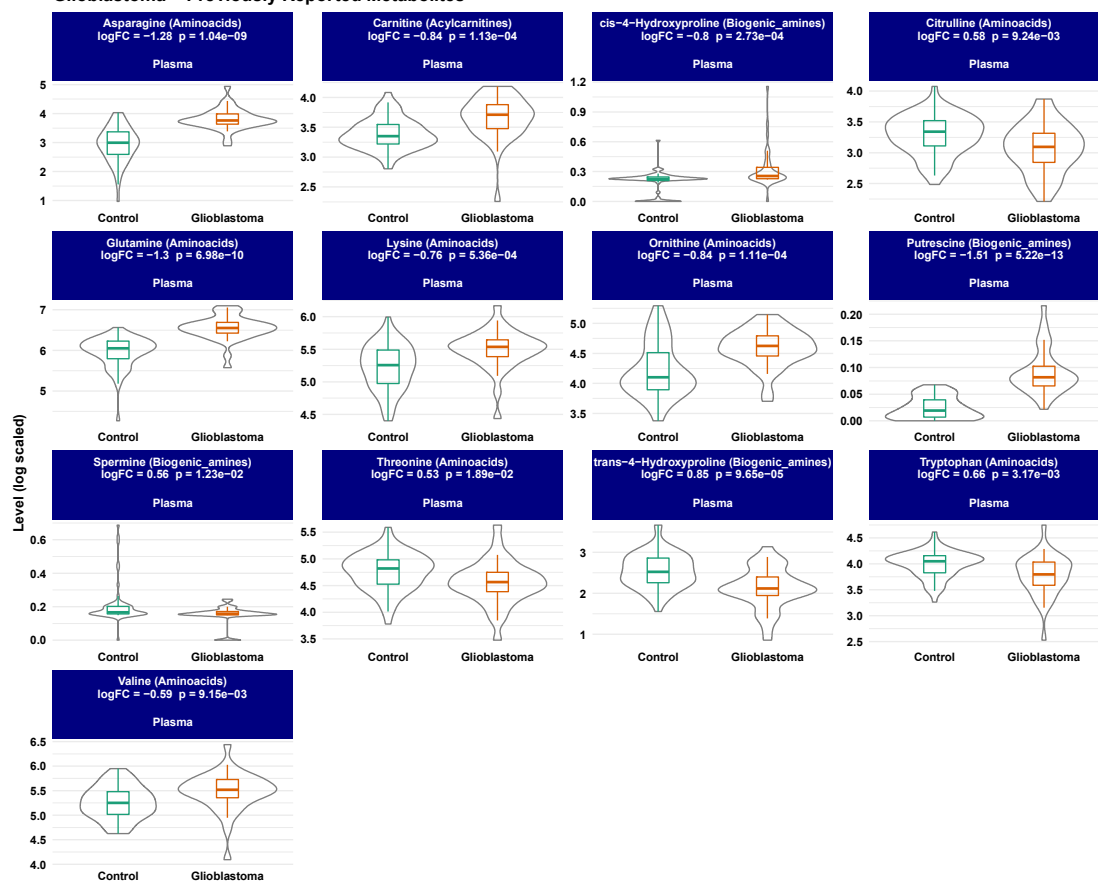

Figure S3. Boxplots of previously reported metabolites.

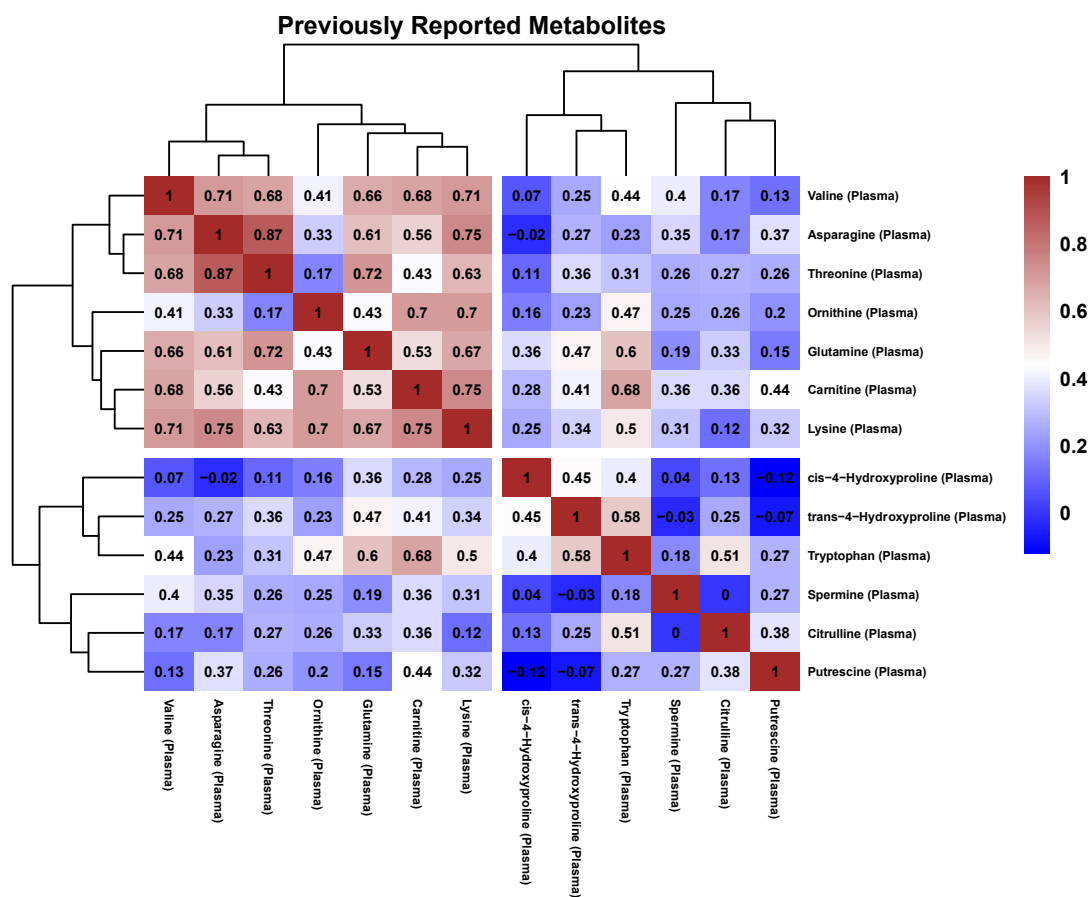

**Figure S4.** Heatmap of Spearman correlations of previously reported metabolites.

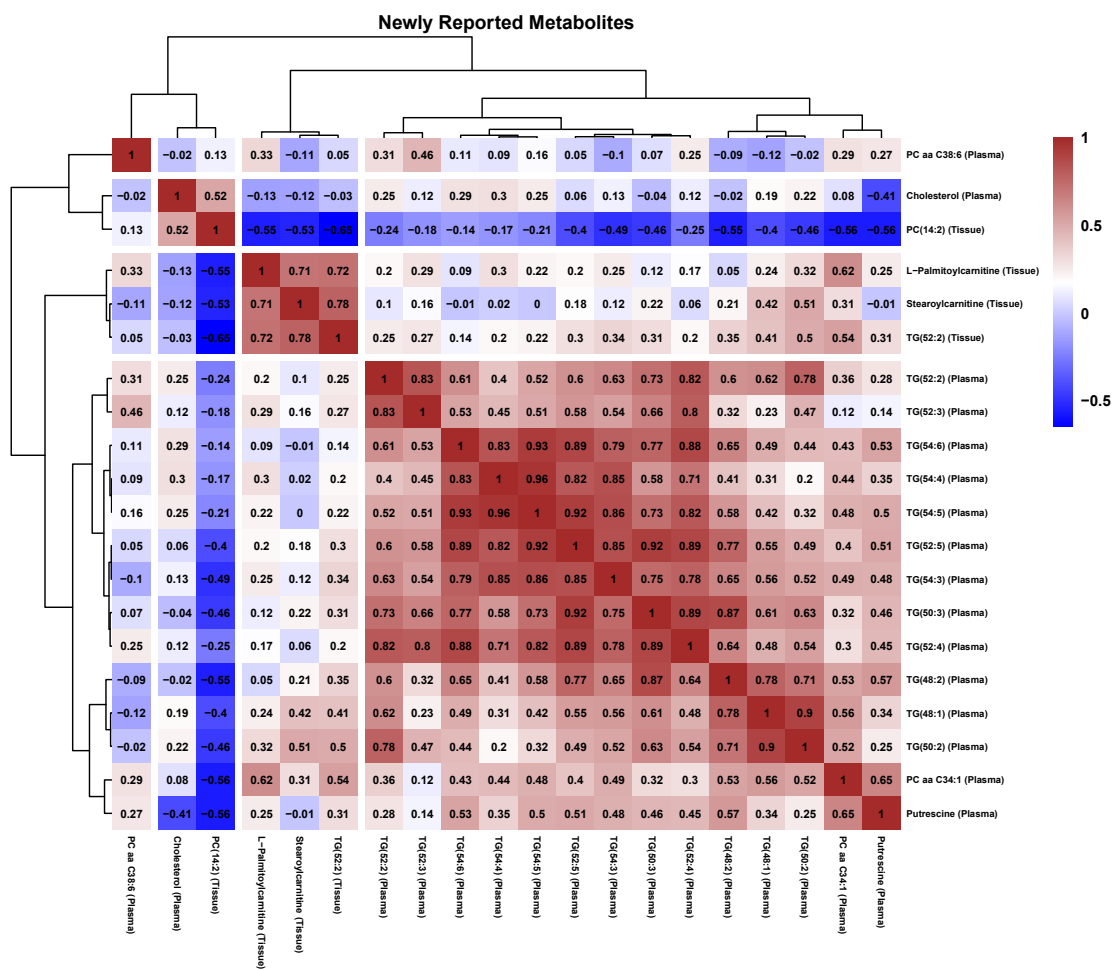

Figure S5. Heatmap of Spearman correlations of newly reported metabolites.

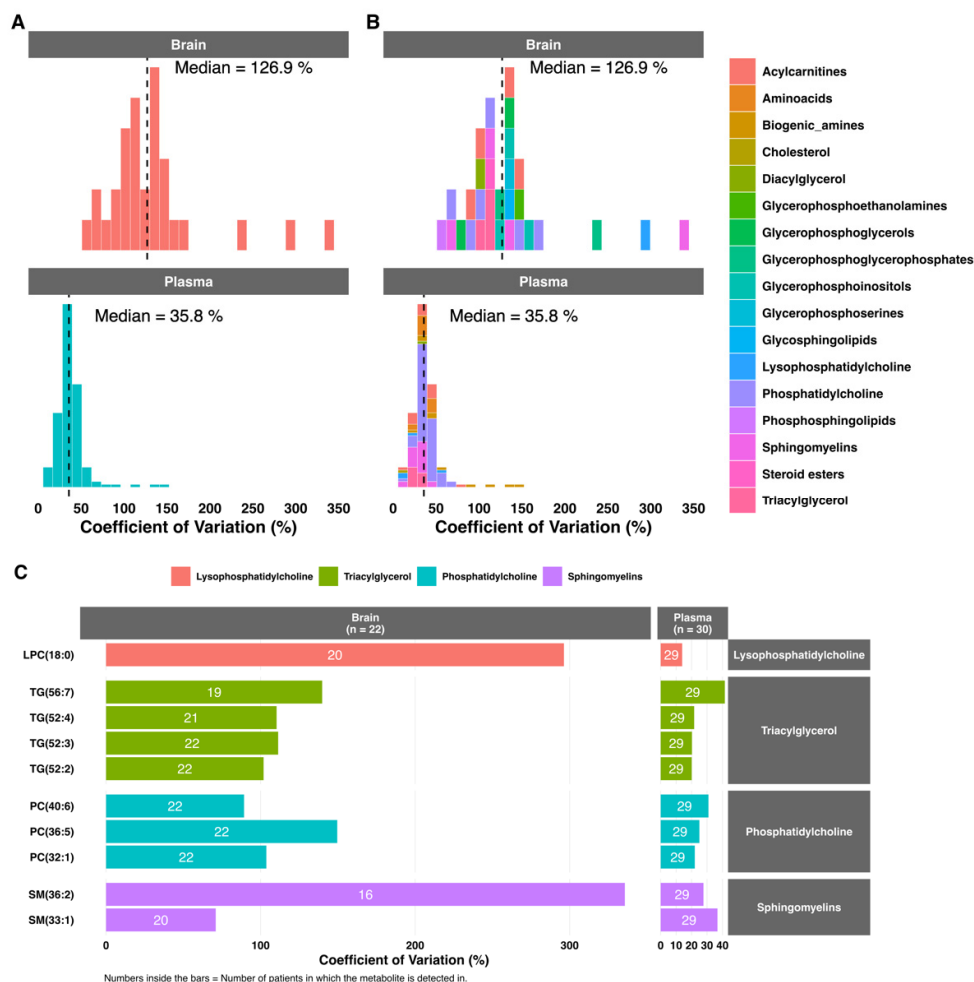

**Figure S6.** Intra-group (GBM) variation. A) Histogram distribution of coefficient of variation in brain and plasma (Colored according to matrice). B) Histogram distribution of coefficient of variation in brain and plasma (Colored according to biochemical classes). C) Coefficient of variation of the 10 lipids correlated between plasma and brain samples.

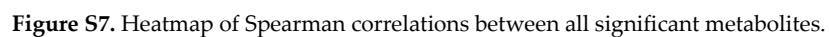

**Figure S7.** Heatmap of Spearman correlations between all significant metabolites.

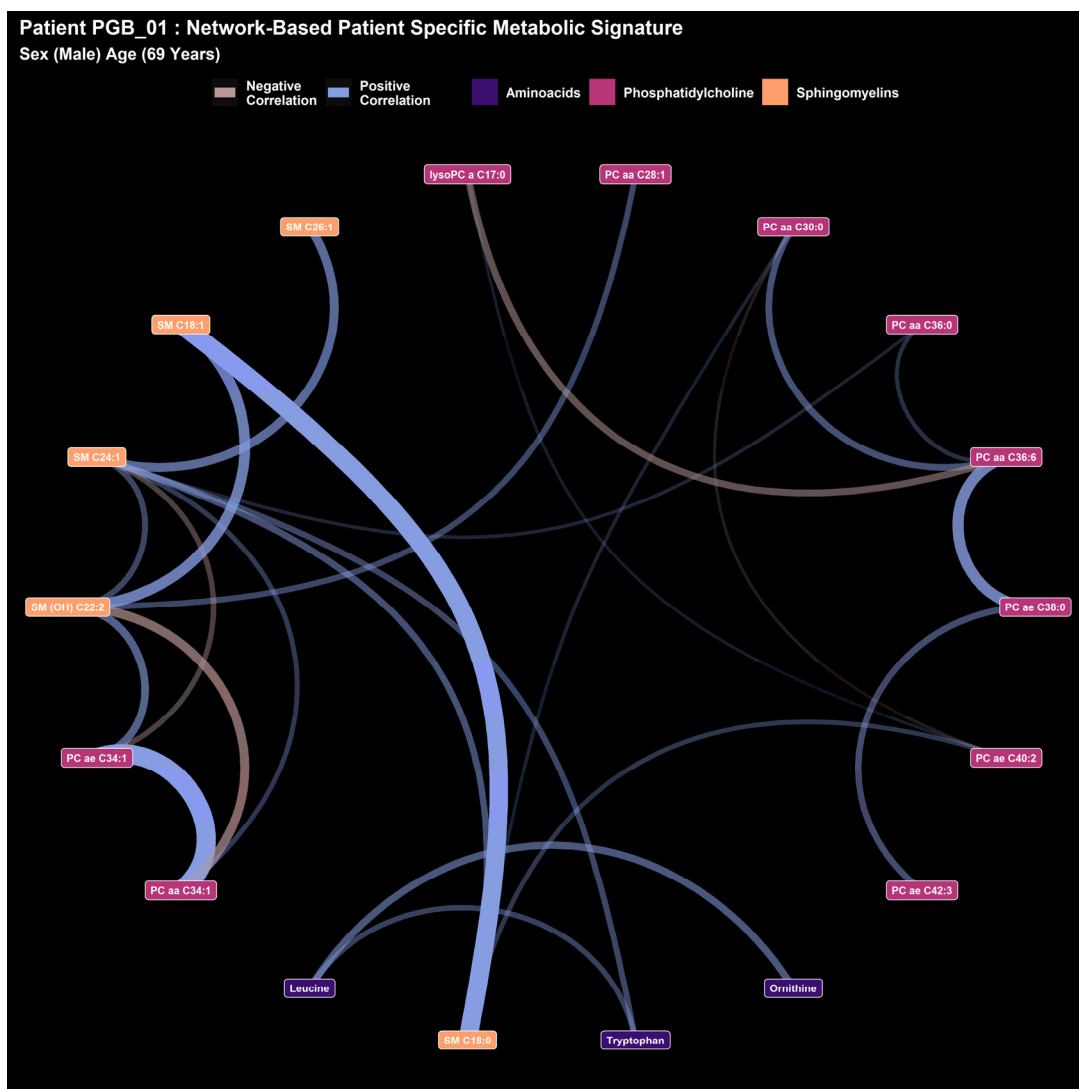

**Figure S8.** Network-based patient specific plasma metabolic signature (Patient PGB\_01). The signature includes 18 metabolites; 10 phosphatidylcholines, 5 sphingomyelin and 3 aminoacids.

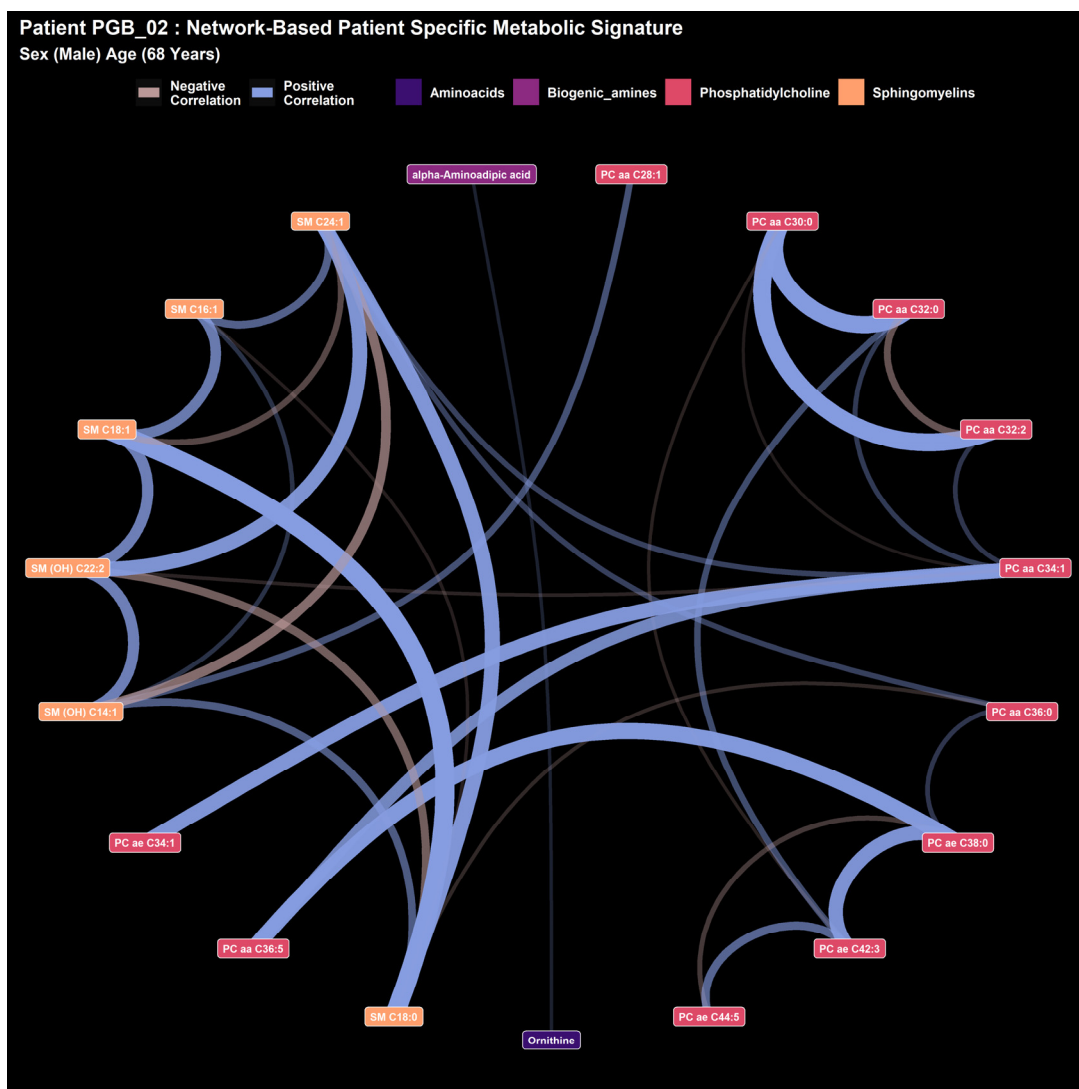

**Figure S9.** Network-based patient specific plasma metabolic signature (Patient PGB\_02). The signature includes 19 metabolites; 11 phosphatidylcholines, 6 sphingomyelin, 1 aminoacid and 1 biogenic amine.

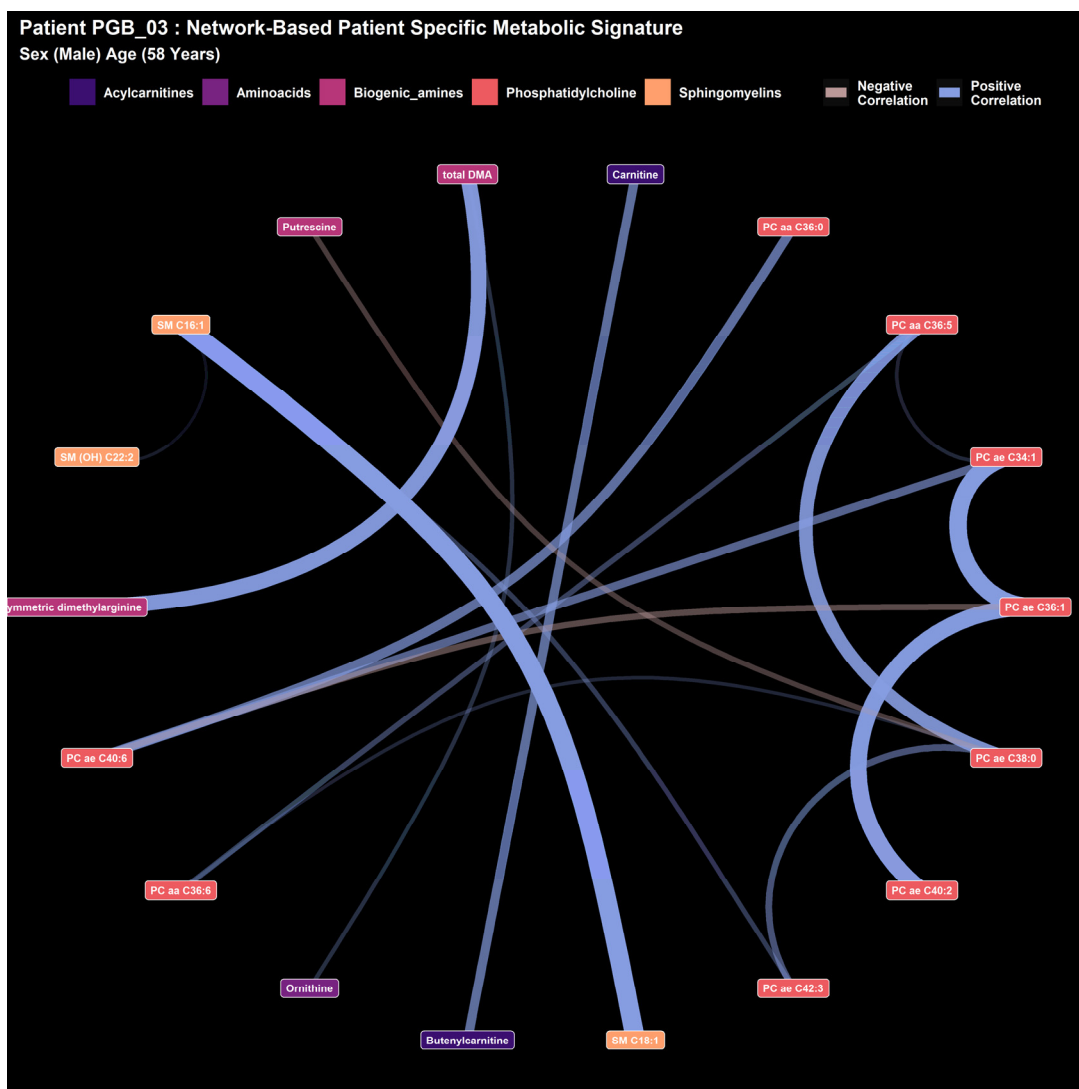

**Figure S10.** Network-based patient specific plasma metabolic signature (Patient PGB\_03). The signature includes 18 metabolites; 9 phosphatidylcholines, 3 sphingomyelin, 1 aminoacid and 3 biogenic amines.

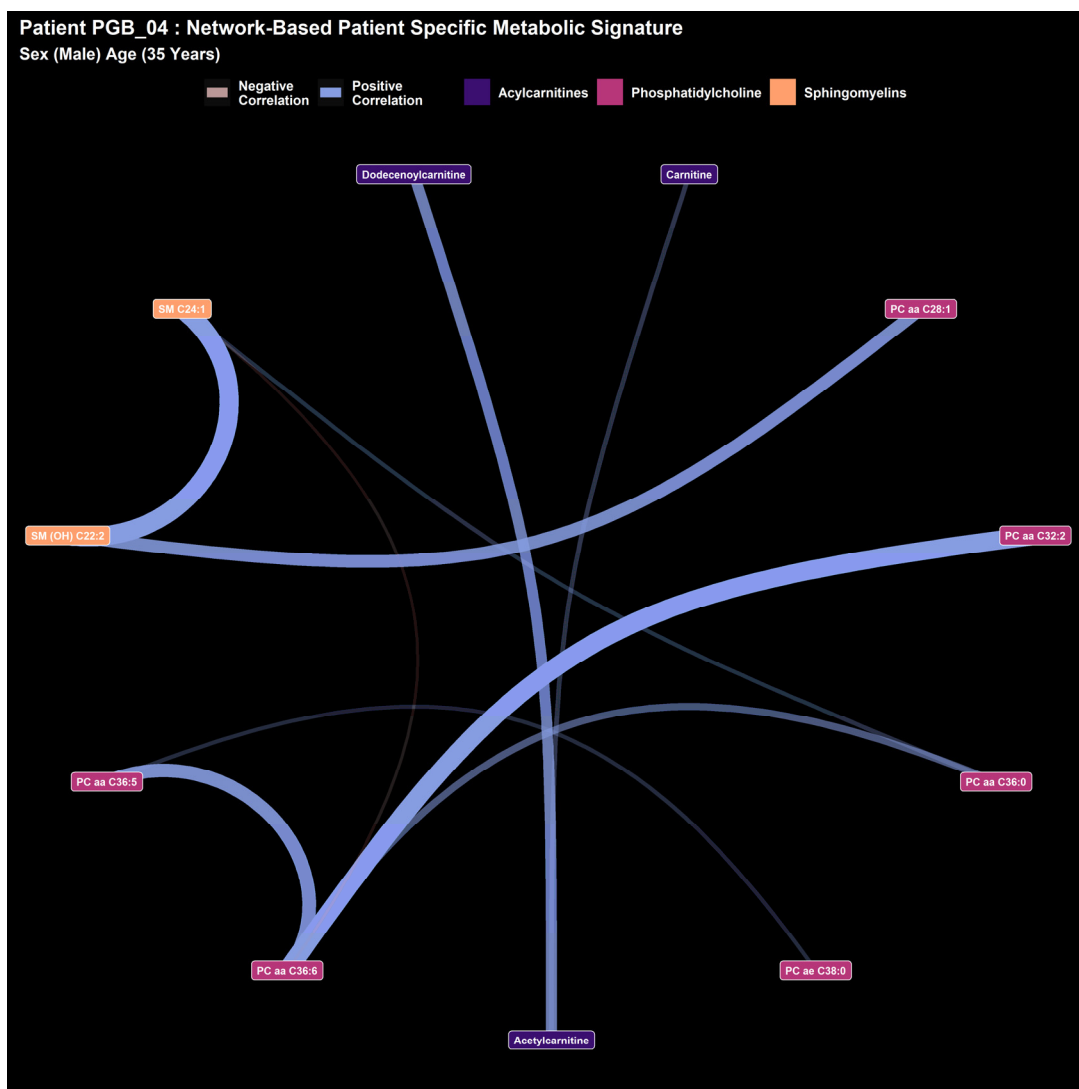

**Figure S11.** Network-based patient specific plasma metabolic signature (Patient PGB\_04). The signature includes 11 metabolites; 6 phosphatidylcholines, 3 acylcarnitines and 2 sphingomyelins.

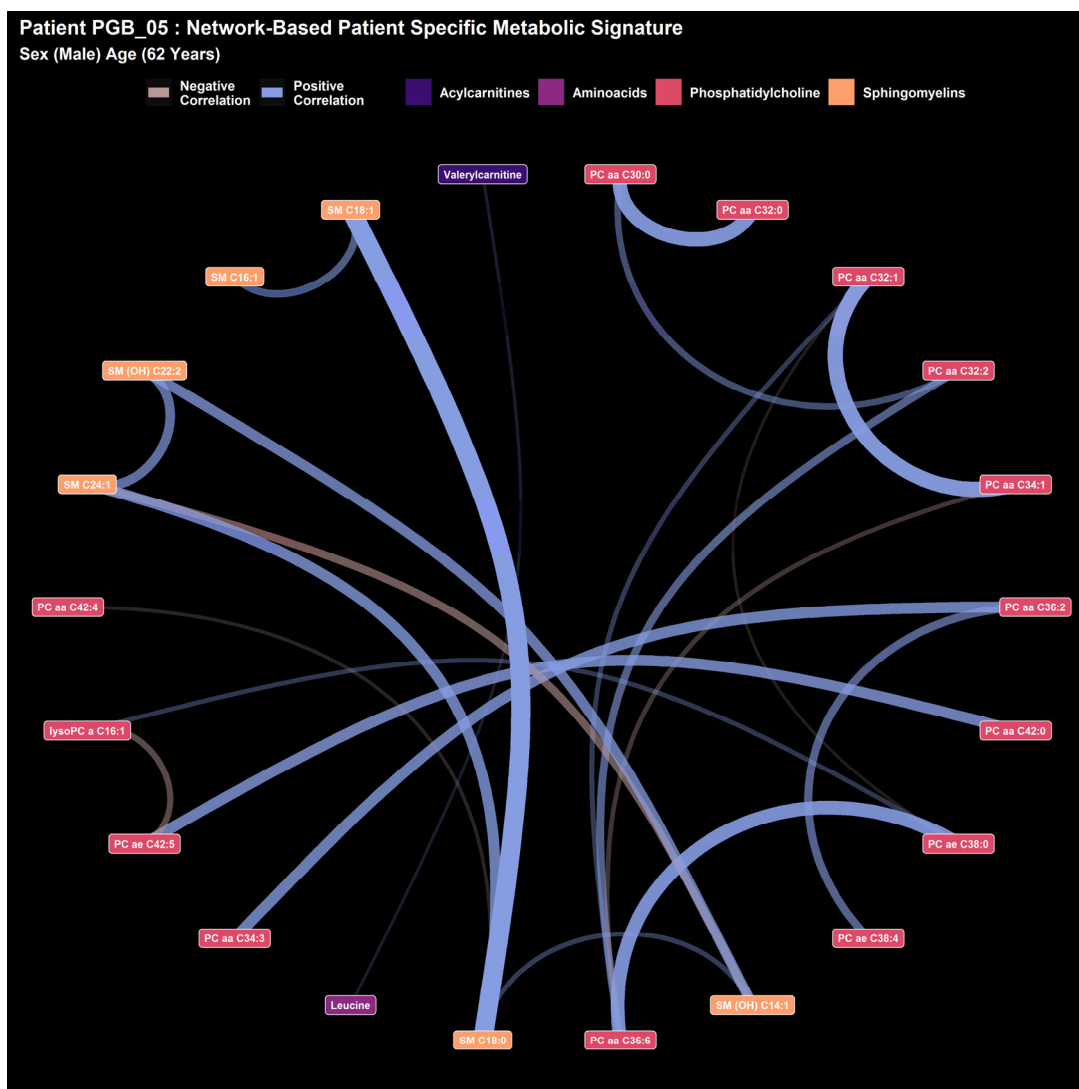

**Figure S12.** Network-based patient specific plasma metabolic signature (Patient PGB\_05). The signature includes 22 metabolites; 14 phosphatidylcholines, 6 sphingomyelin, 1 aminoacid and 1 acylcarnitine.

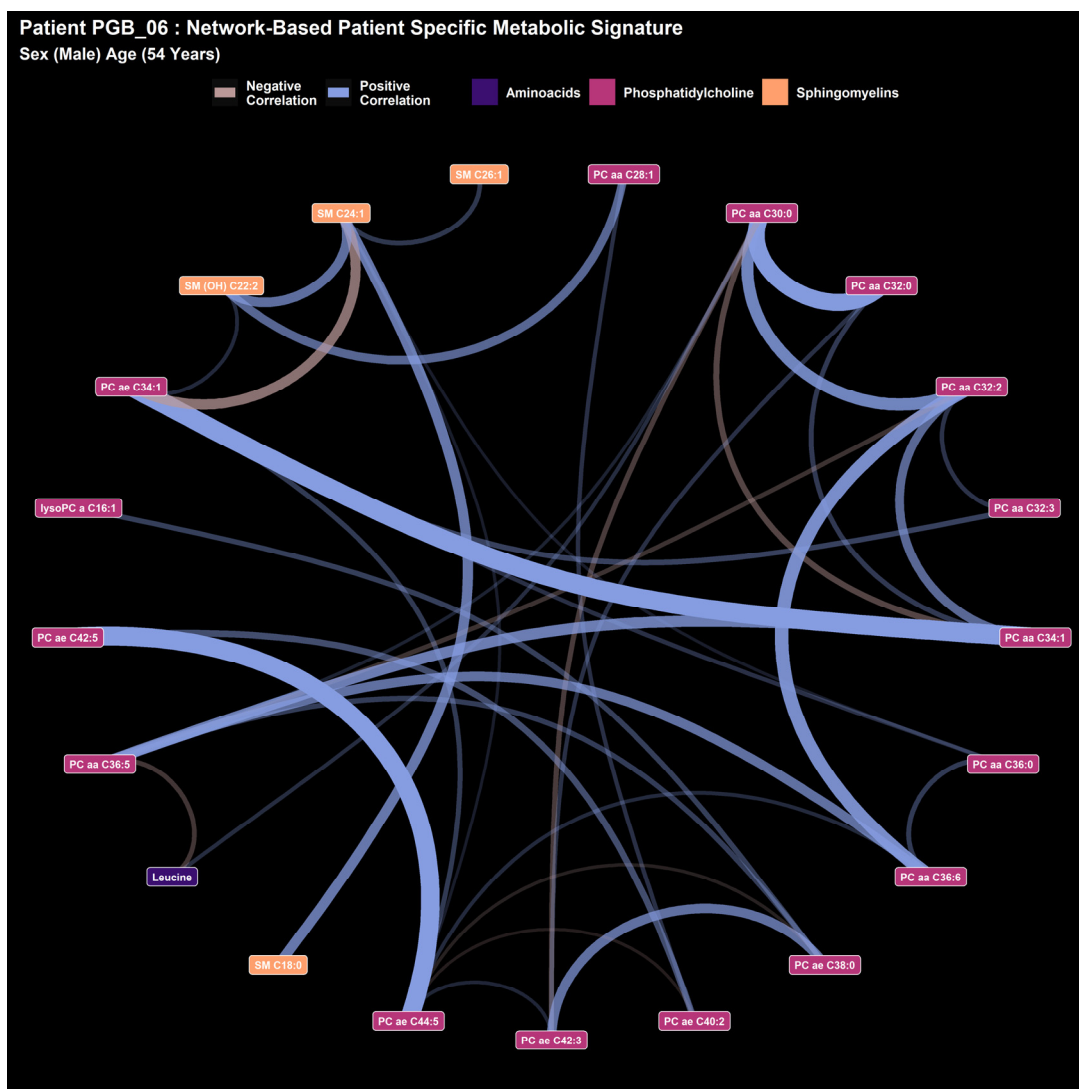

**Figure S13.** Network-based patient specific plasma metabolic signature (Patient PGB\_06). The signature includes 21 metabolites; 16 phosphatidylcholines, 4 sphingomyelins and 1 aminoacid.

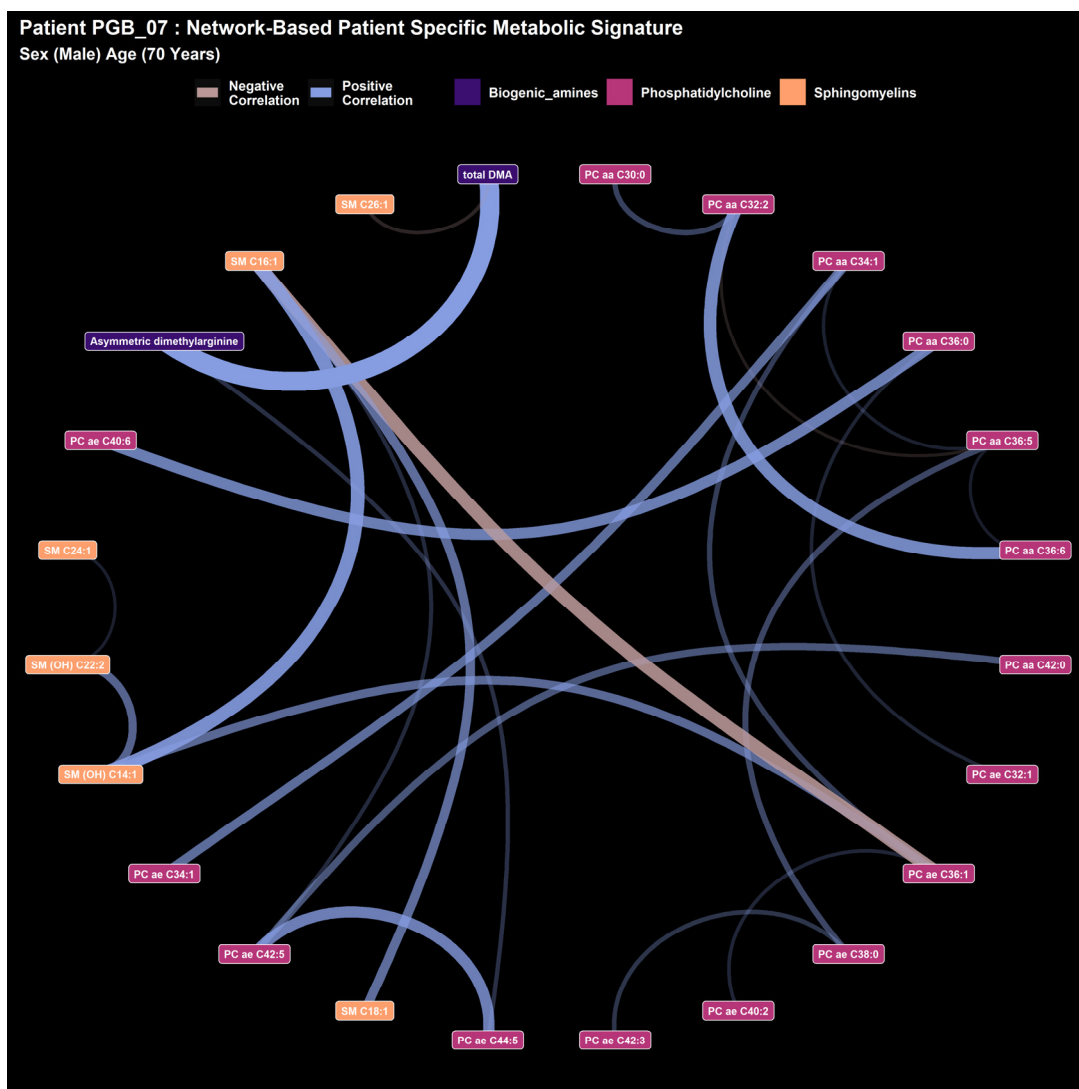

**Figure S14.** Network-based patient specific plasma metabolic signature (Patient PGB\_07). The signature includes 24 metabolites; 16 phosphatidylcholines, 6 sphingomyelins and 2 biogenic amines.

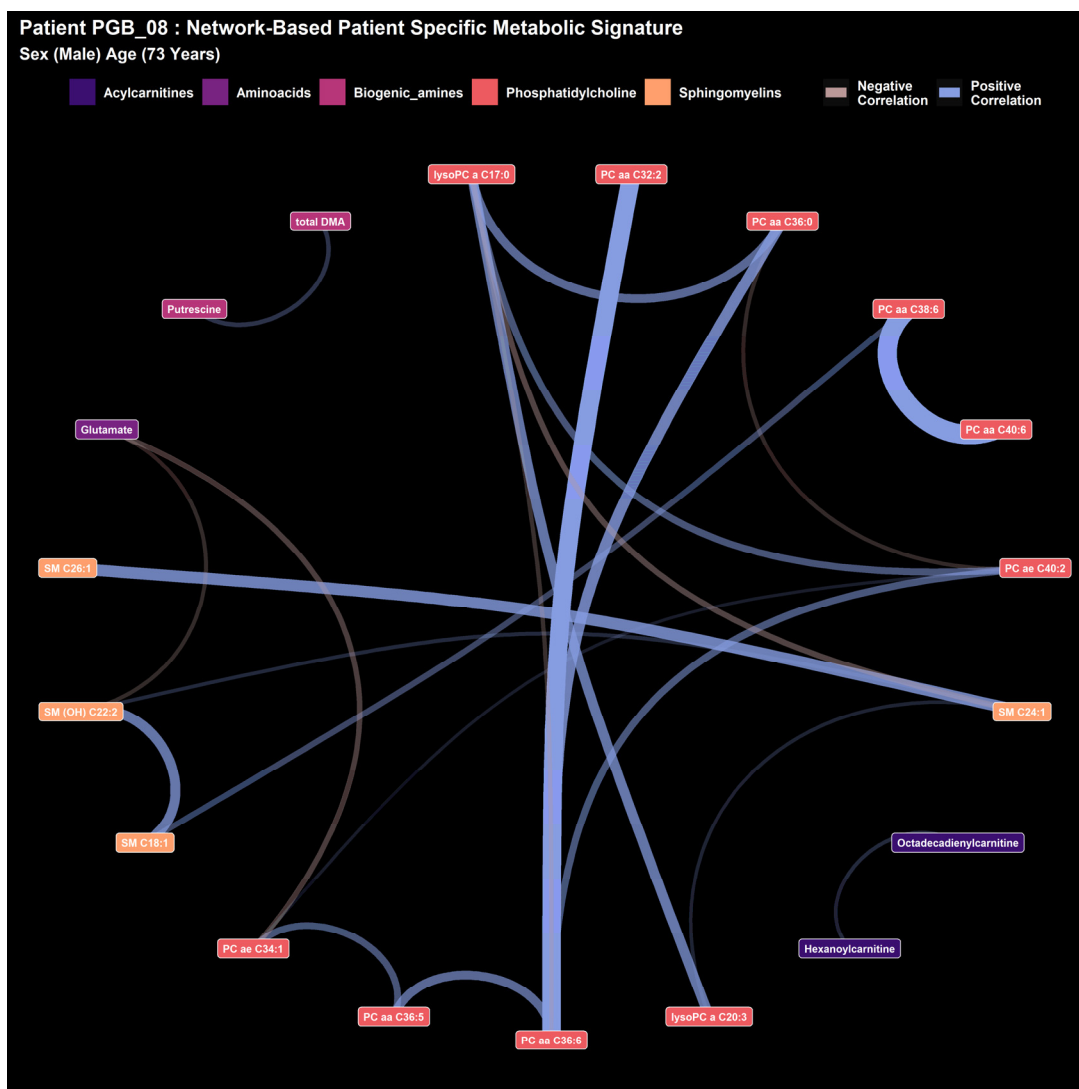

**Figure S15.** Network-based patient specific plasma metabolic signature (Patient PGB\_08). The signature includes 19 metabolites; 10 phosphatidylcholines, 4 sphingomyelins, 2 acylcarnitines, 2 biogenic amines and 1 aminoacid.

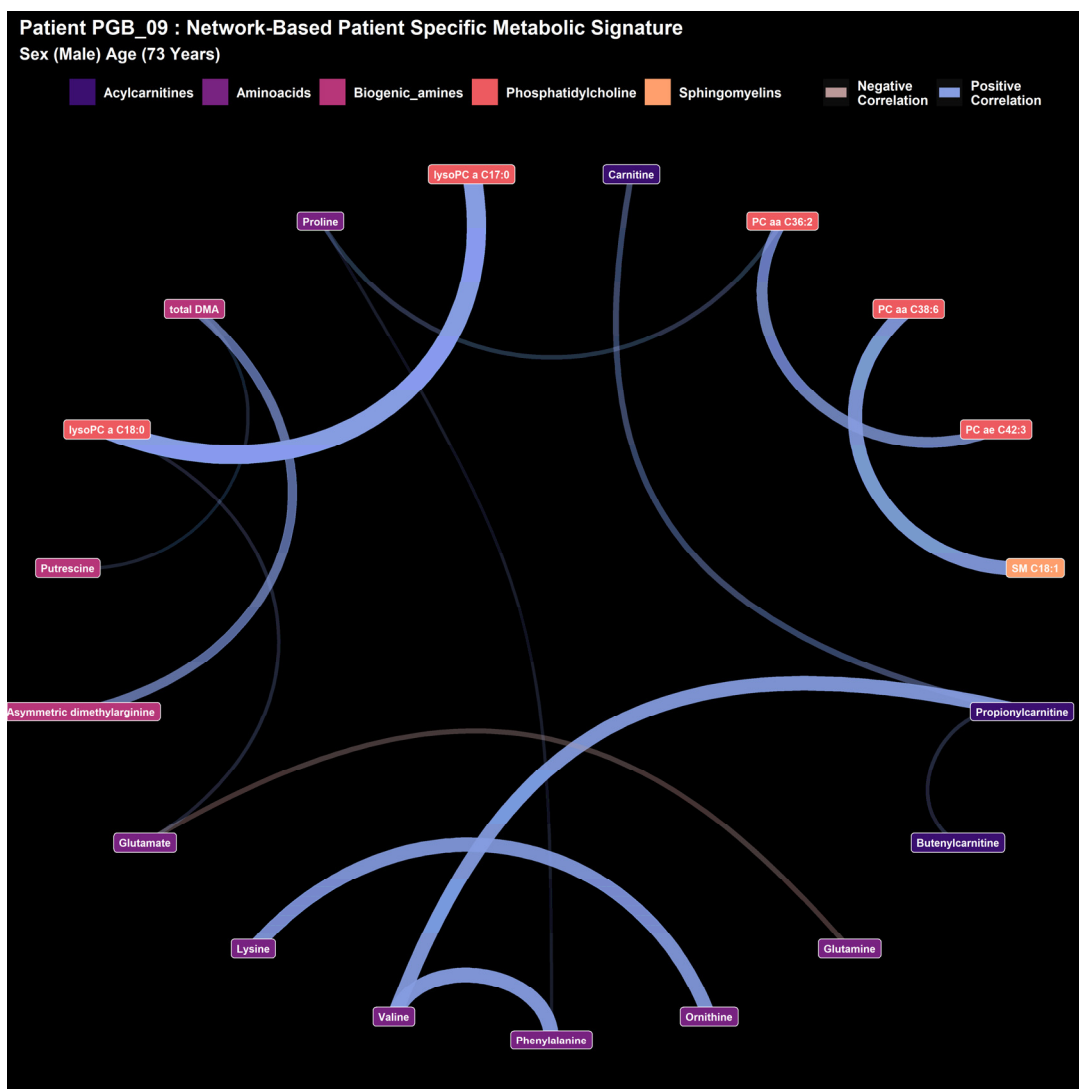

**Figure S16.** Network-based patient specific plasma metabolic signature (Patient PGB\_09). The signature includes 19 metabolites; 5 phosphatidylcholines, 7 aminoacids, 3 acylcarnitines, 3 biogenic amines and 1 sphingomyelin.

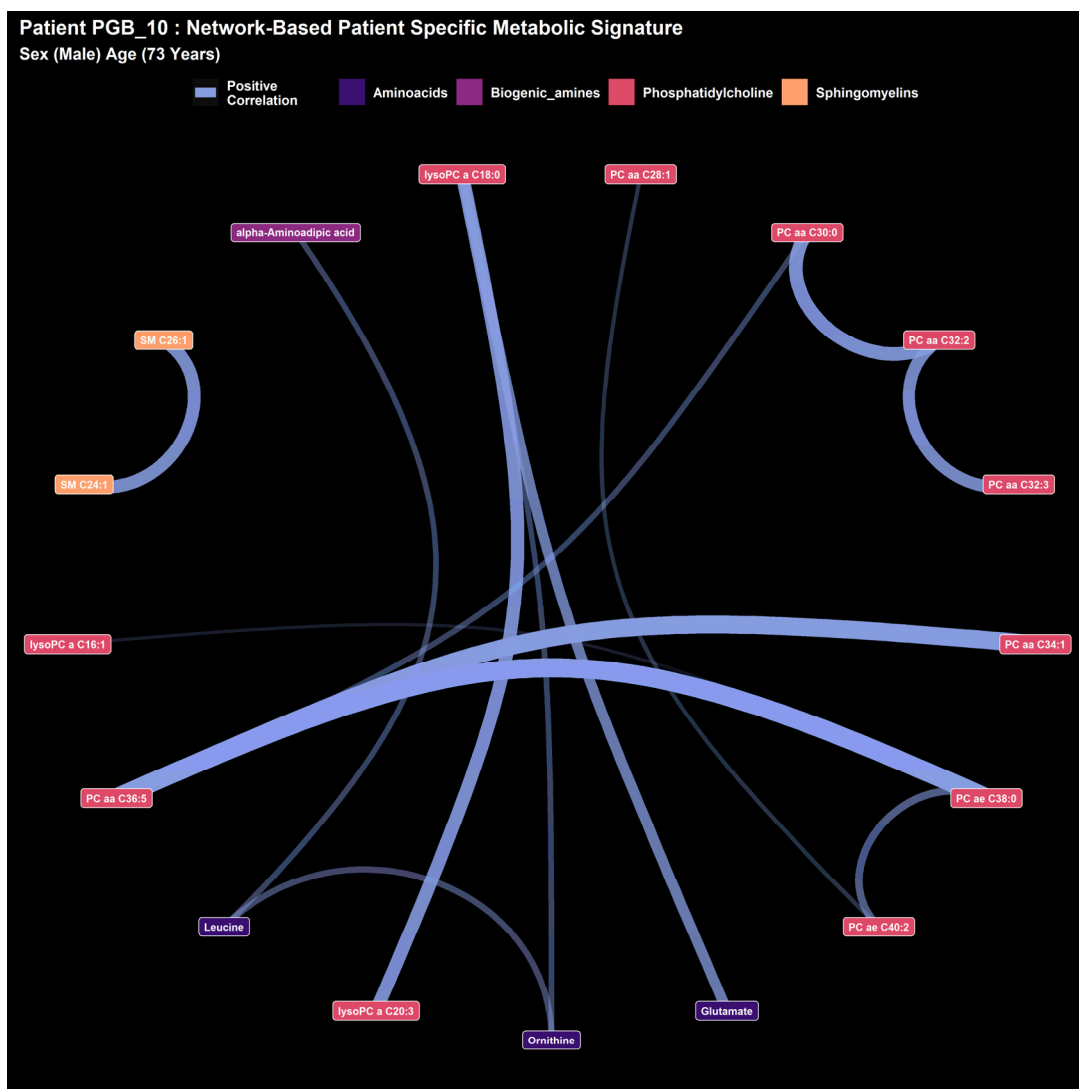

**Figure S17.** Network-based patient specific plasma metabolic signature (Patient PGB\_10). The signature includes 17 metabolites; 11 phosphatidylcholines, 3 aminoacids, 1 biogenic amine and 2 sphingomyelins.

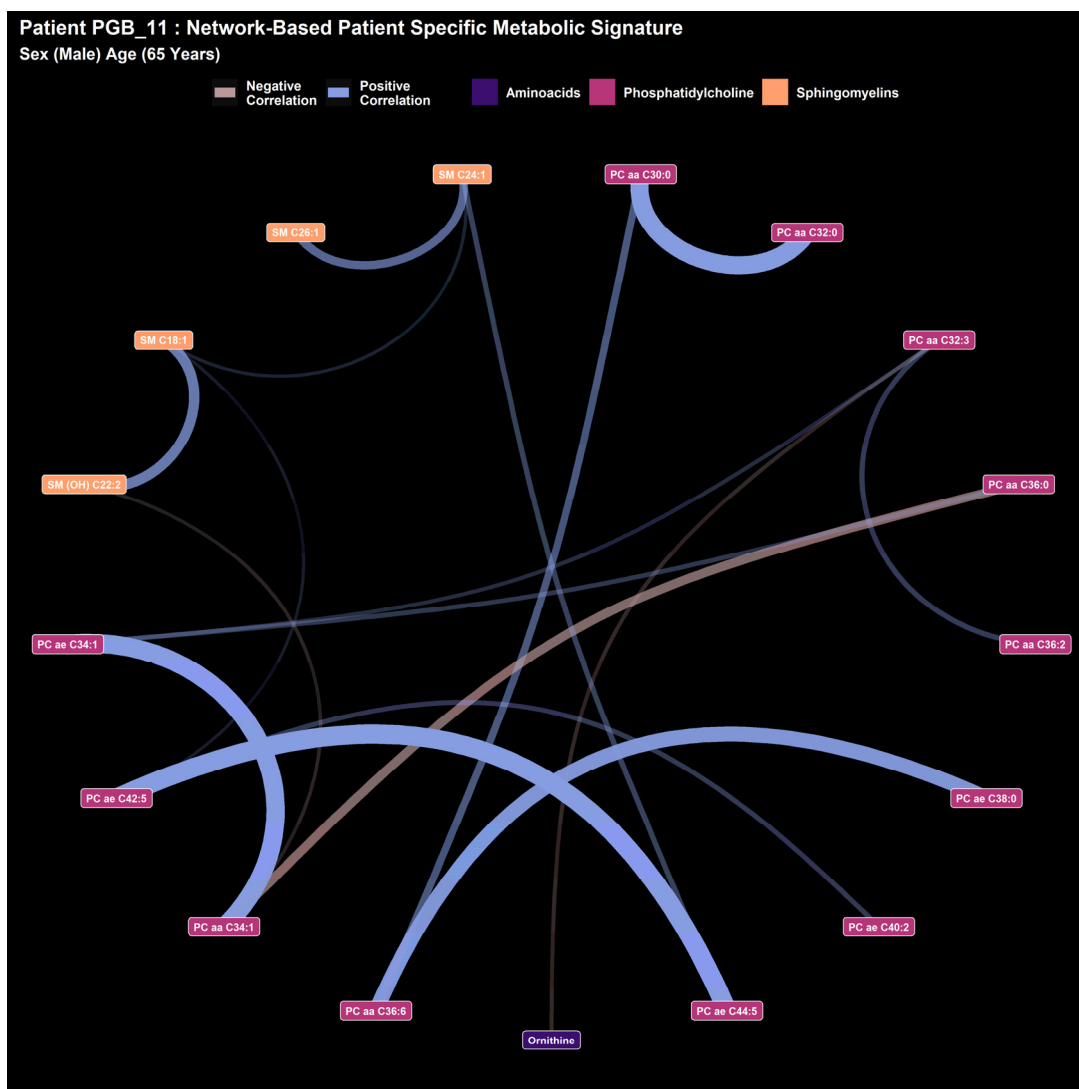

**Figure S18.** Network-based patient specific plasma metabolic signature (Patient PGB\_11). The signature includes 17 metabolites; 12 phosphatidylcholines, 1 aminoacid, and 4 sphingomyelins.

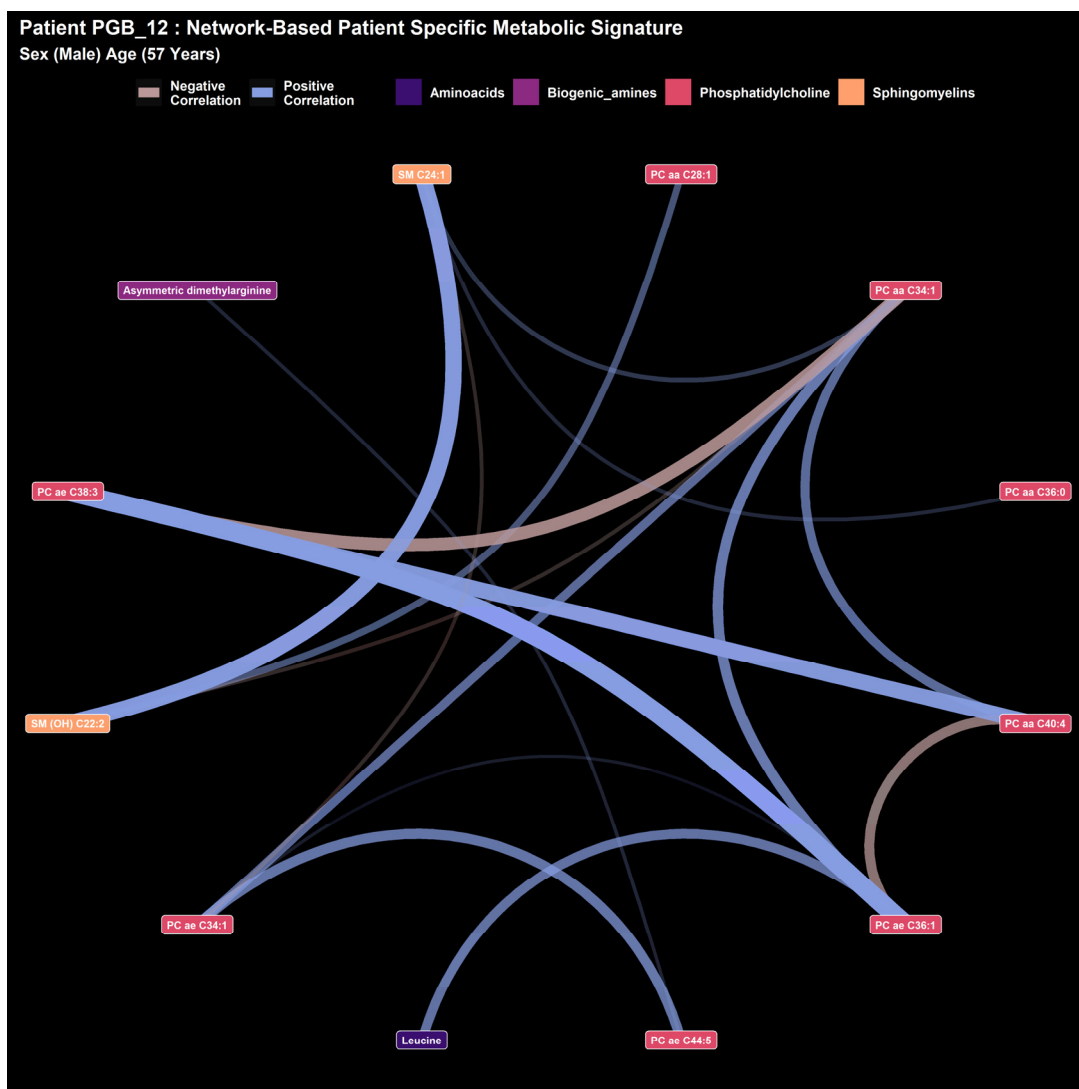

**Figure S19.** Network-based patient specific plasma metabolic signature (Patient PGB\_12). The signature includes 12 metabolites; 8 phosphatidylcholines, 2 aminoacids, 1 biogenic amine and 2 sphingomyelins.



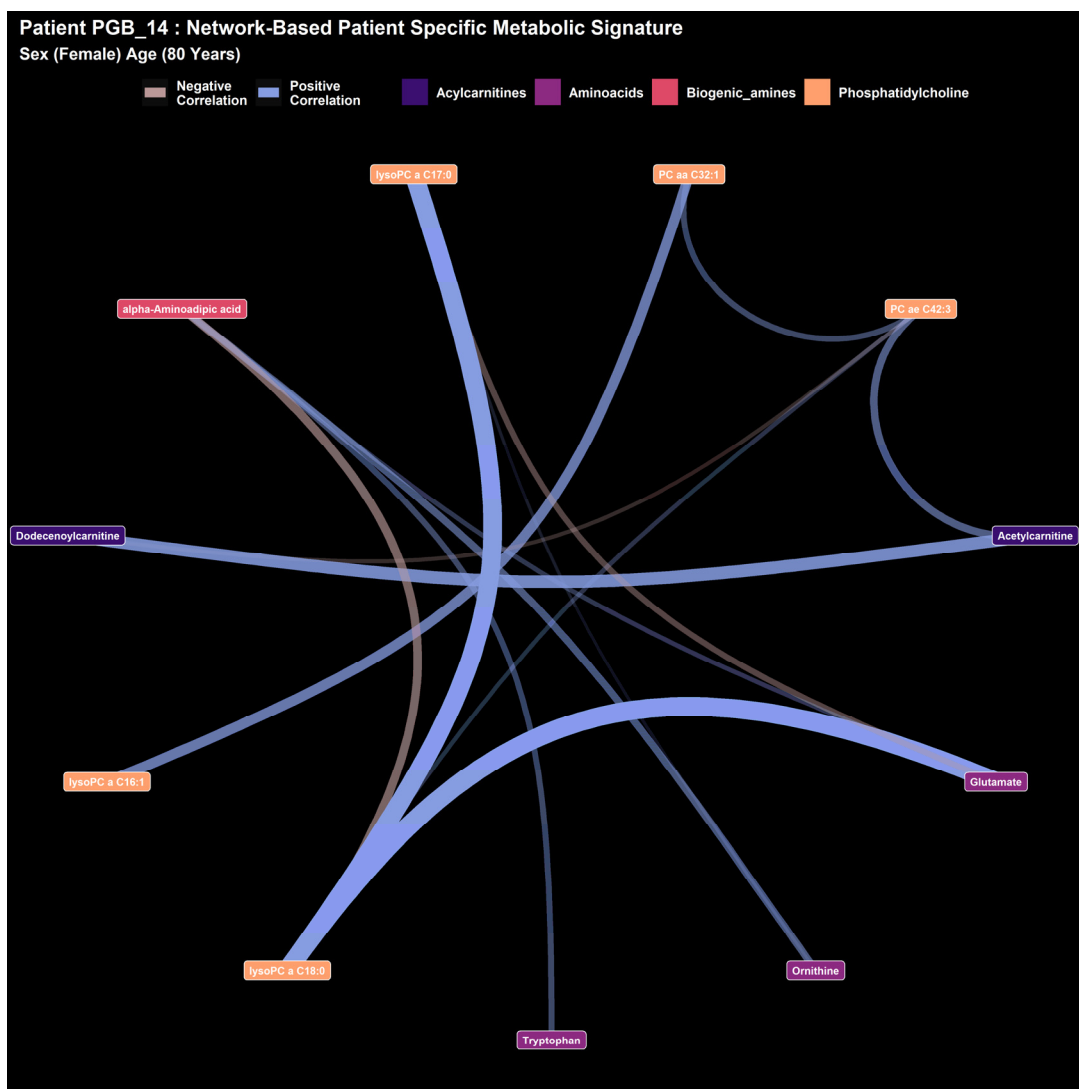

**Figure S21.** Network-based patient specific plasma metabolic signature (Patient PGB\_14). The signature includes 11 metabolites; 5 phosphatidylcholines, 3 aminoacids, 2 acylcarnitines and 1 biogenic amine.

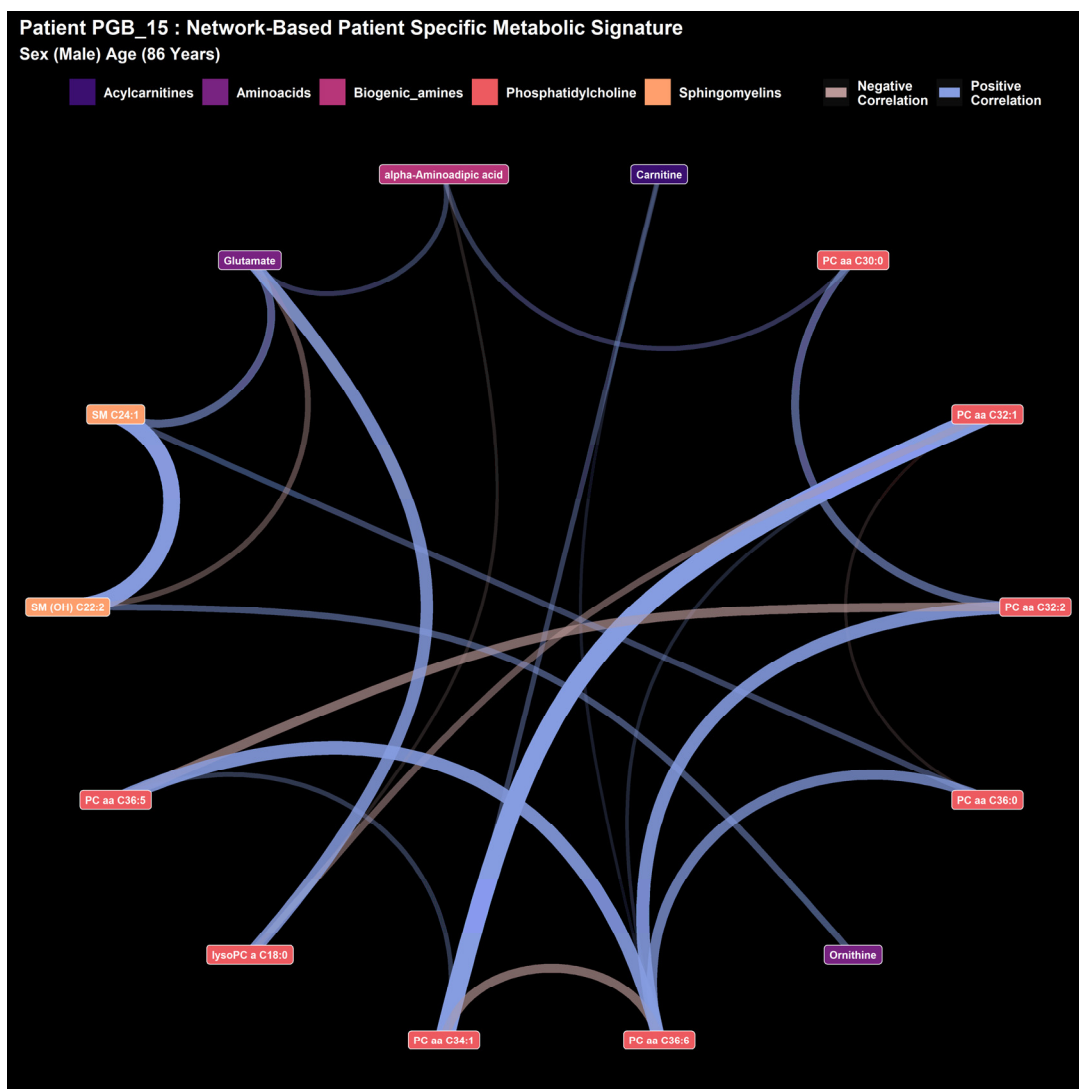

**Figure S22.** Network-based patient specific plasma metabolic signature (Patient PGB\_15). The signature includes 14 metabolites; 8 phosphatidylcholines, 2 aminoacids, 1 acylcarnitine, 1 biogenic amine and 2 sphingomyelins.

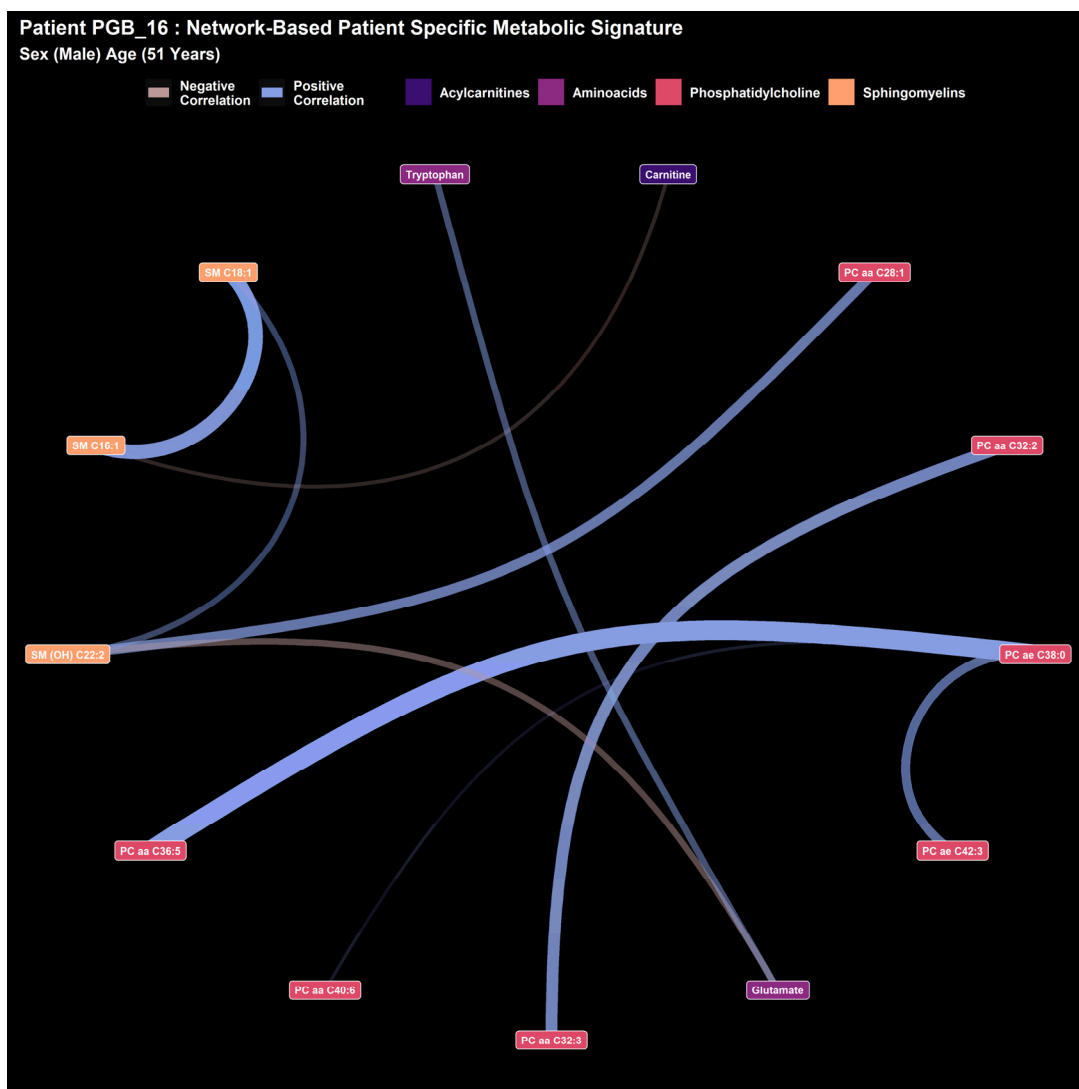

**Figure S23.** Network-based patient specific plasma metabolic signature (Patient PGB\_16). The signature includes 13 metabolites; 7 phosphatidylcholines, 2 aminoacids, 1 acylcarnitine and 3 sphingomyelins.

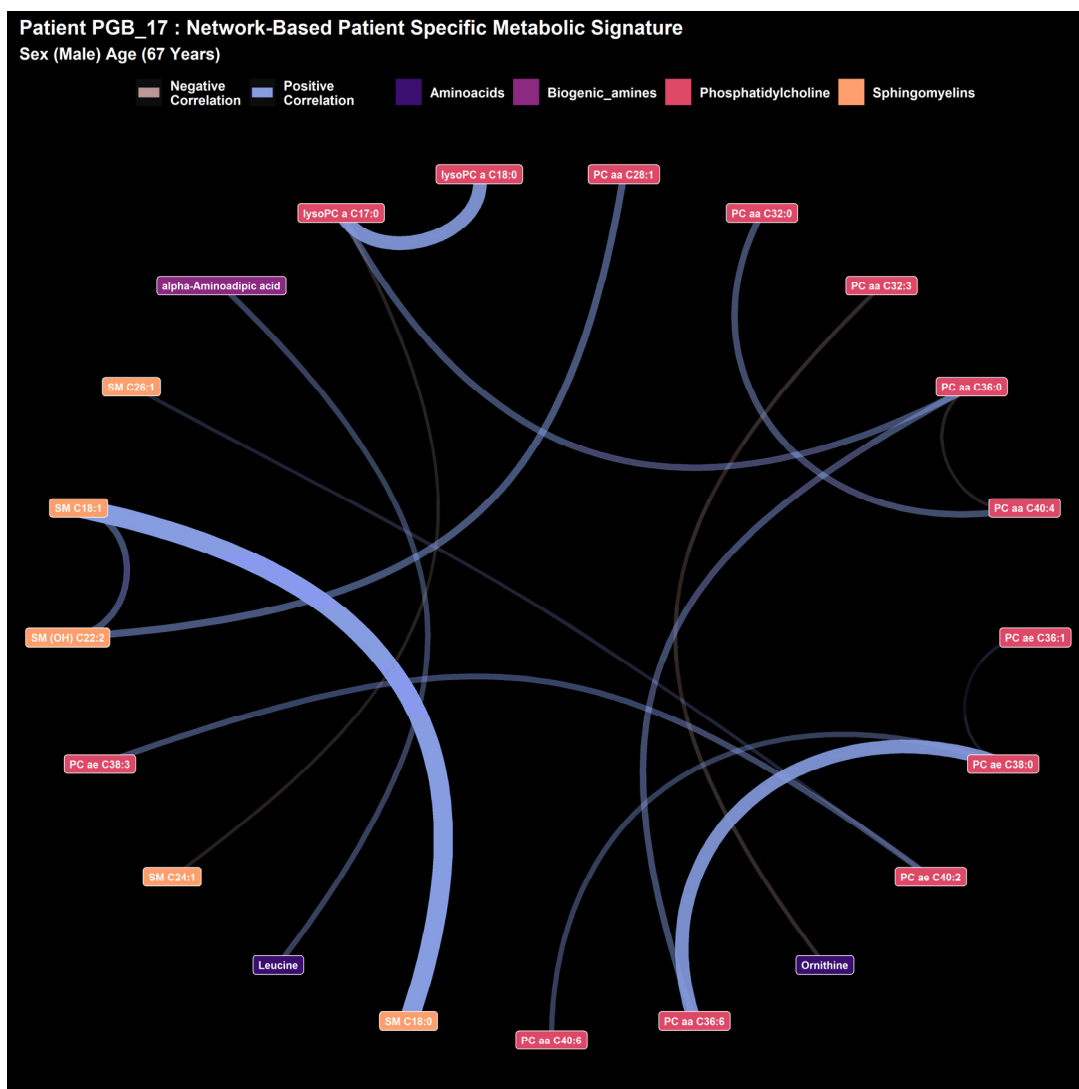

**Figure S24.** Network-based patient specific plasma metabolic signature (Patient PGB\_17). The signature includes 21 metabolites; 13 phosphatidylcholines, 2 aminoacids, 1 biogenic amine and 5 sphingomyelins.

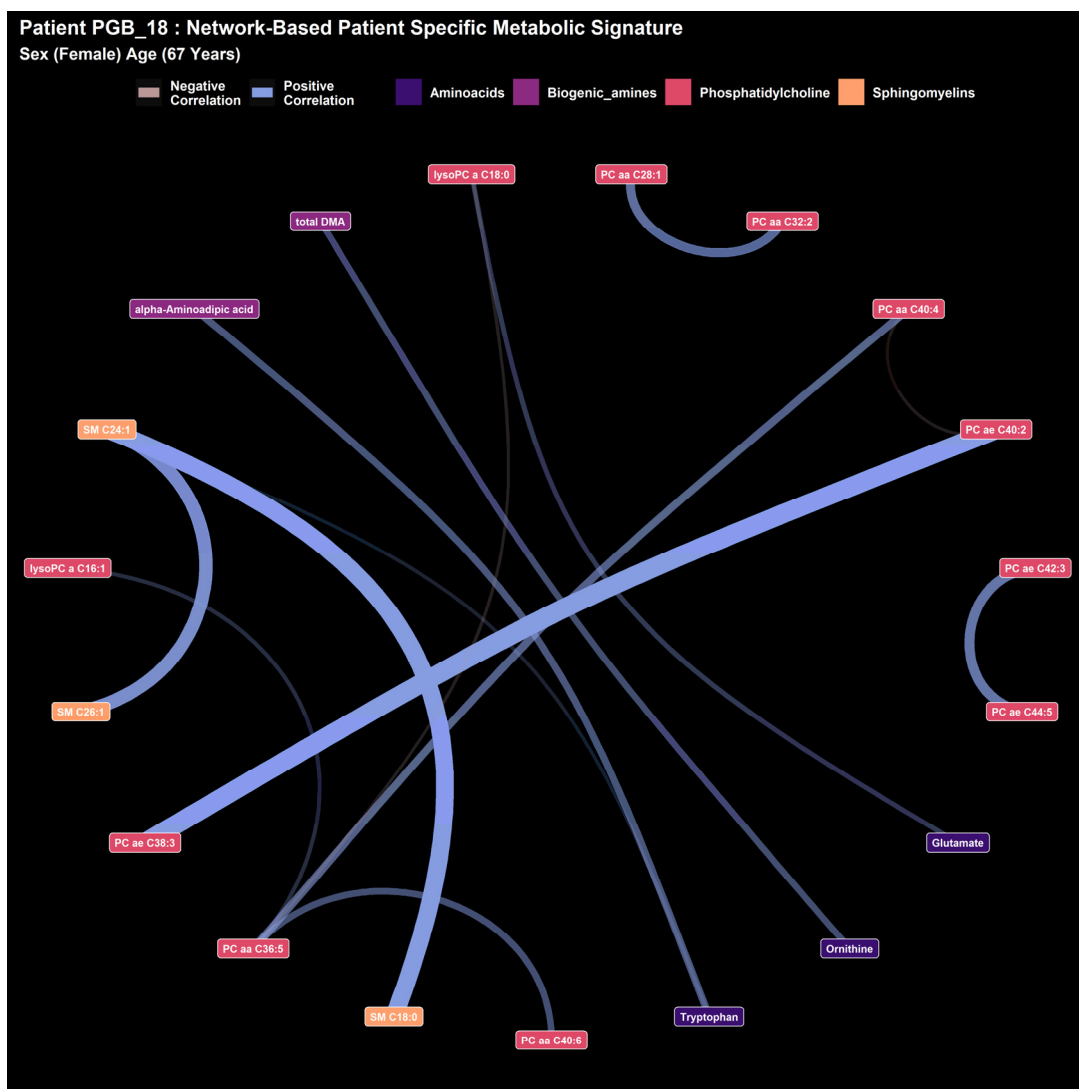

**Figure S25.** Network-based patient specific plasma metabolic signature (Patient PGB\_18). The signature includes 19 metabolites; 11 phosphatidylcholines, 3 aminoacids, 2 biogenic amines and 3 sphingomyelins.

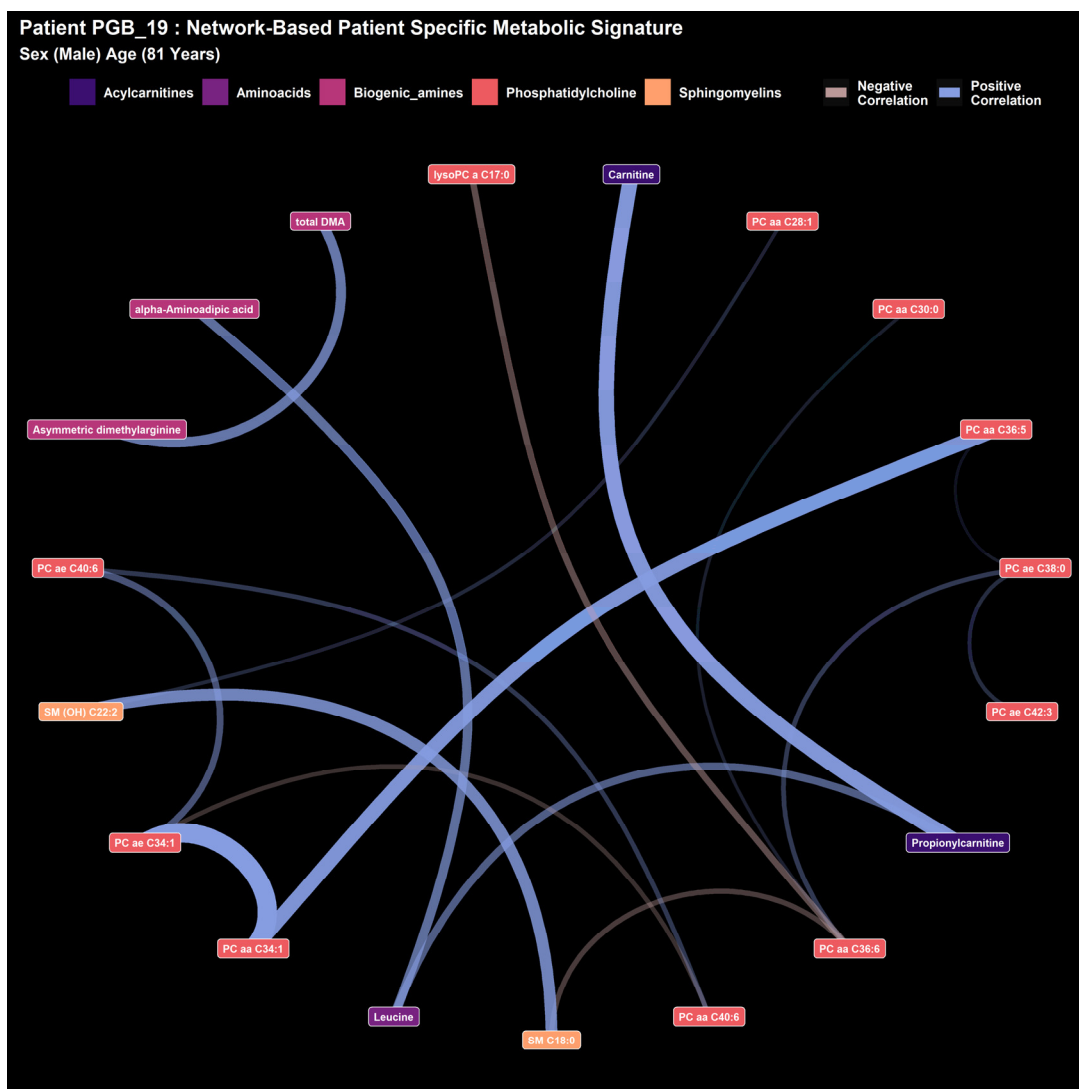

**Figure S26.** Network-based patient specific plasma metabolic signature (Patient PGB\_19). The signature includes 19 metabolites; 11 phosphatidylcholines, 1 aminoacid, 2 acylcarnitines, 3 biogenic amines and 2 sphingomyelins.

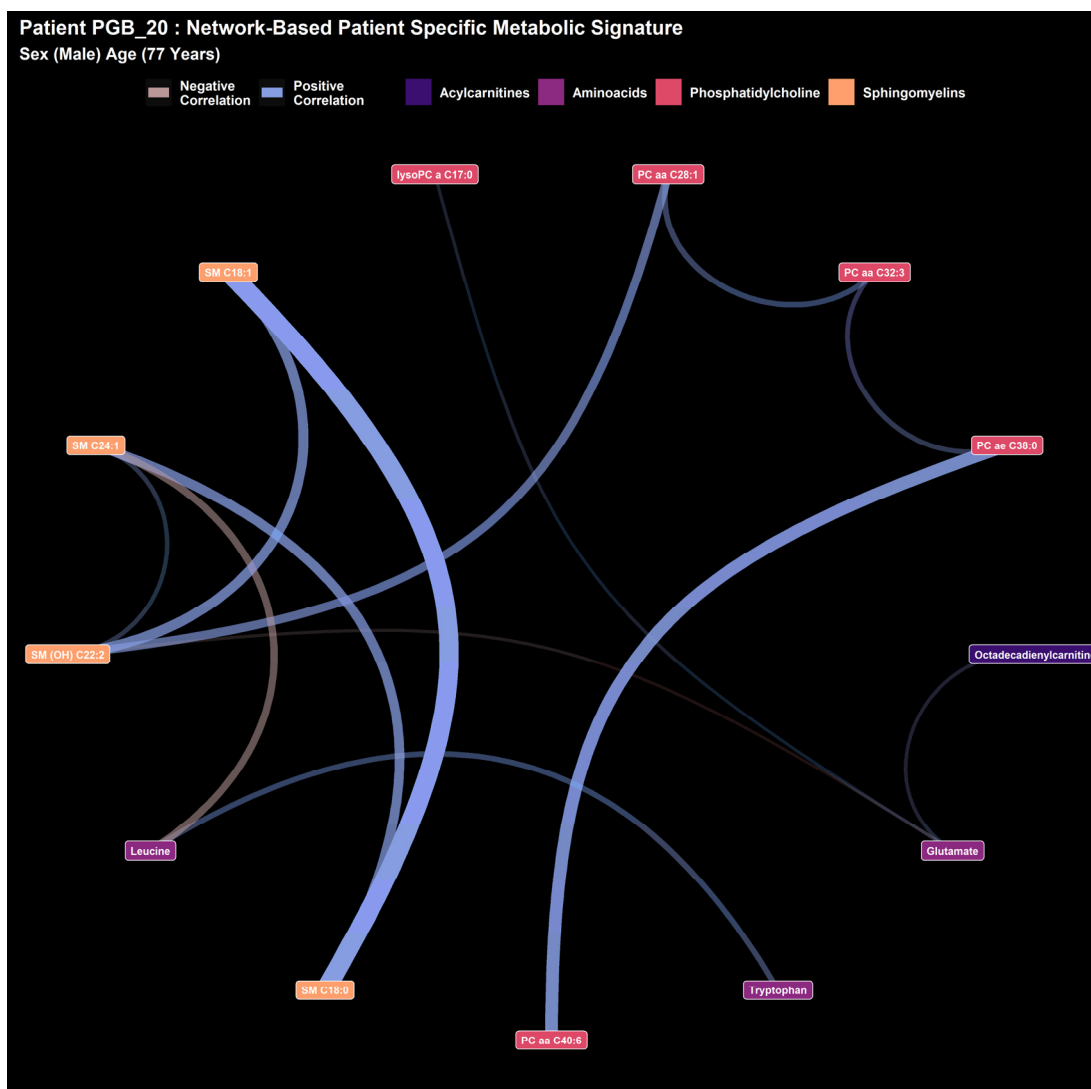

**Figure S27.** Network-based patient specific plasma metabolic signature (Patient PGB\_20). The signature includes 13 metabolites; 5 phosphatidylcholines, 3 aminoacids, 1 acylcarnitine, and 4 sphingomyelins.

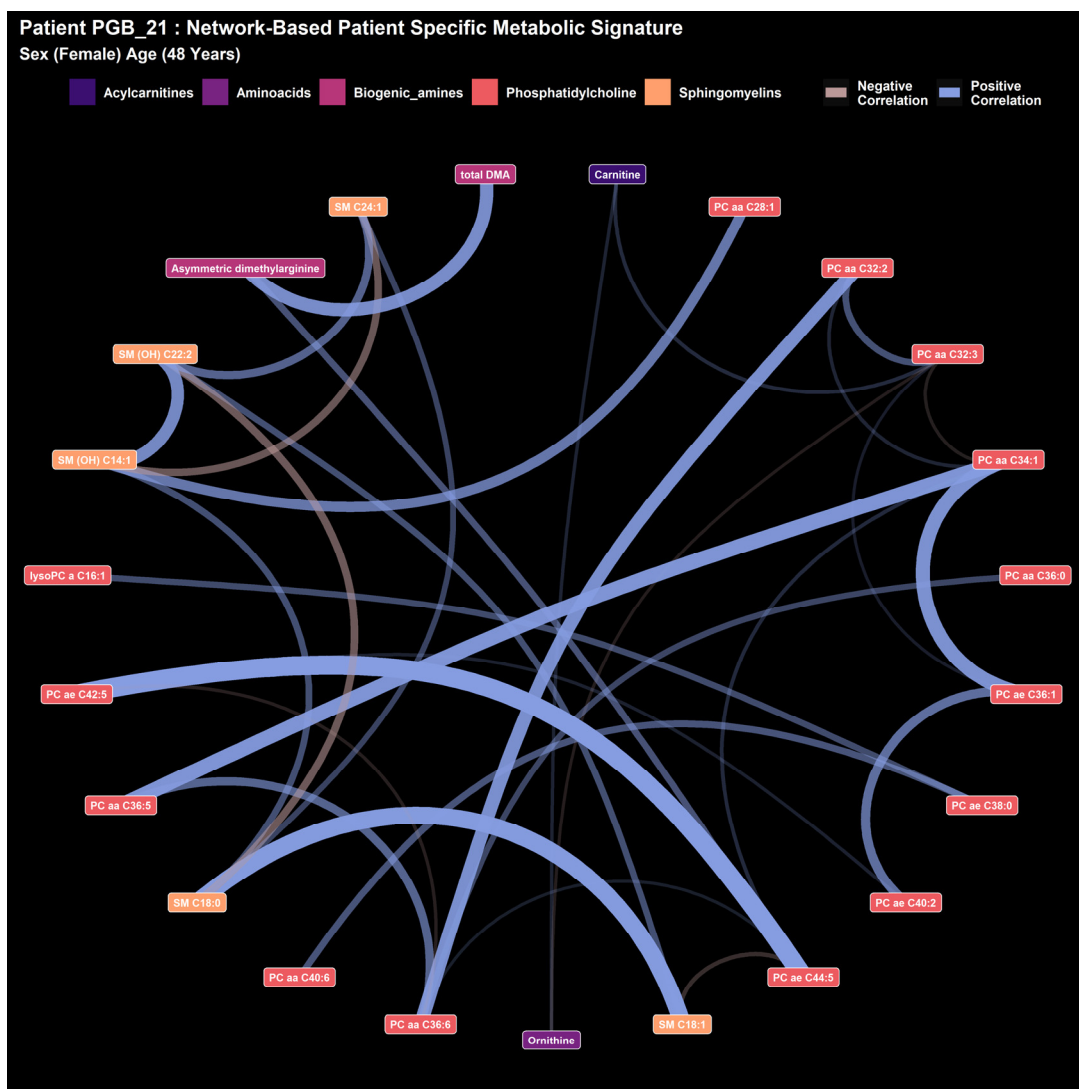

**Figure S28.** Network-based patient specific plasma metabolic signature (Patient PGB\_21). The signature includes 23 metabolites; 14 phosphatidylcholines, 1 aminoacid, 1 acylcarnitine, 2 biogenic amines and 5 sphingomyelins.

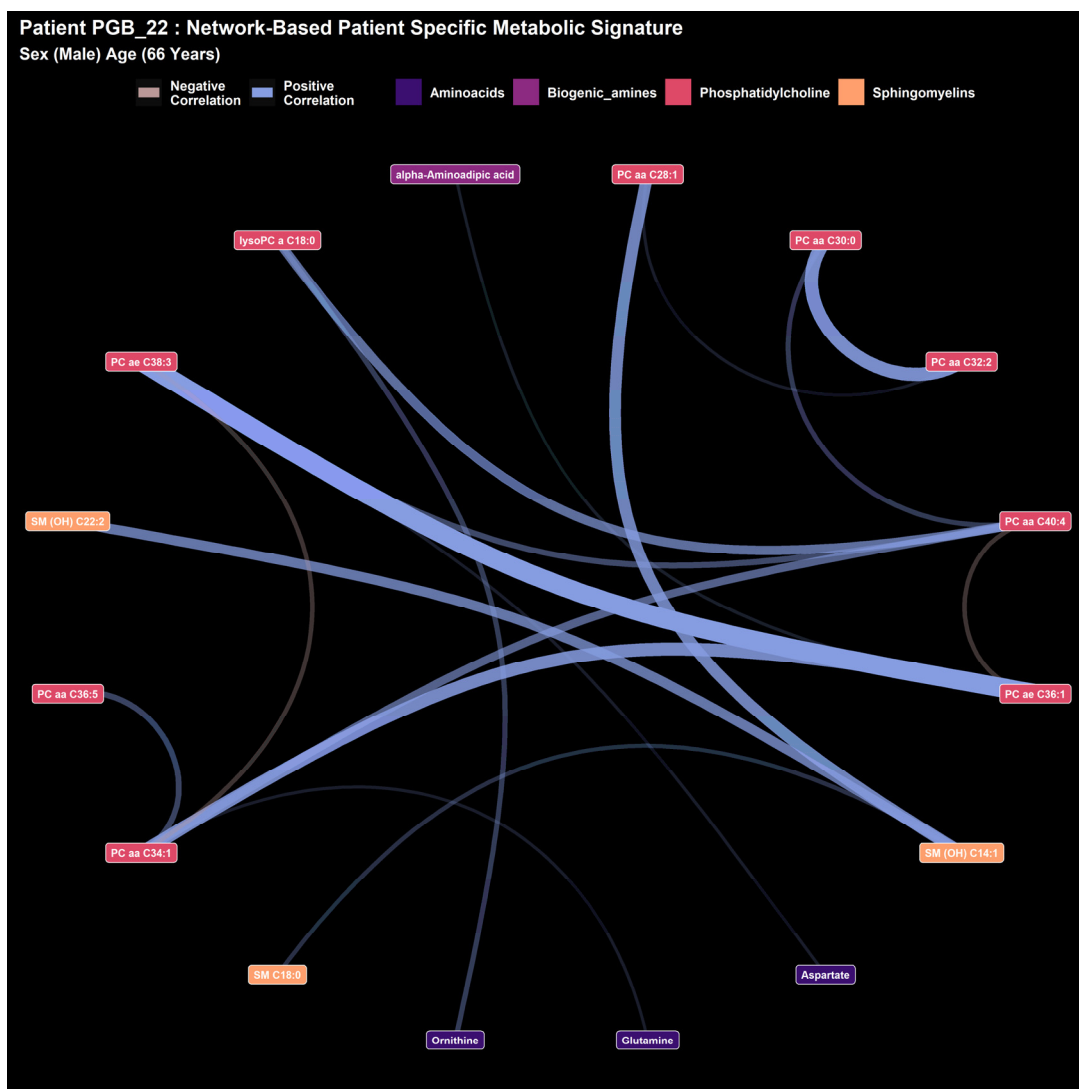

**Figure S29.** Network-based patient specific plasma metabolic signature (Patient PGB\_22). The signature includes 22 metabolites; 9 phosphatidylcholines, 3 aminoacids, 1 biogenic amine and 3 sphingomyelins.

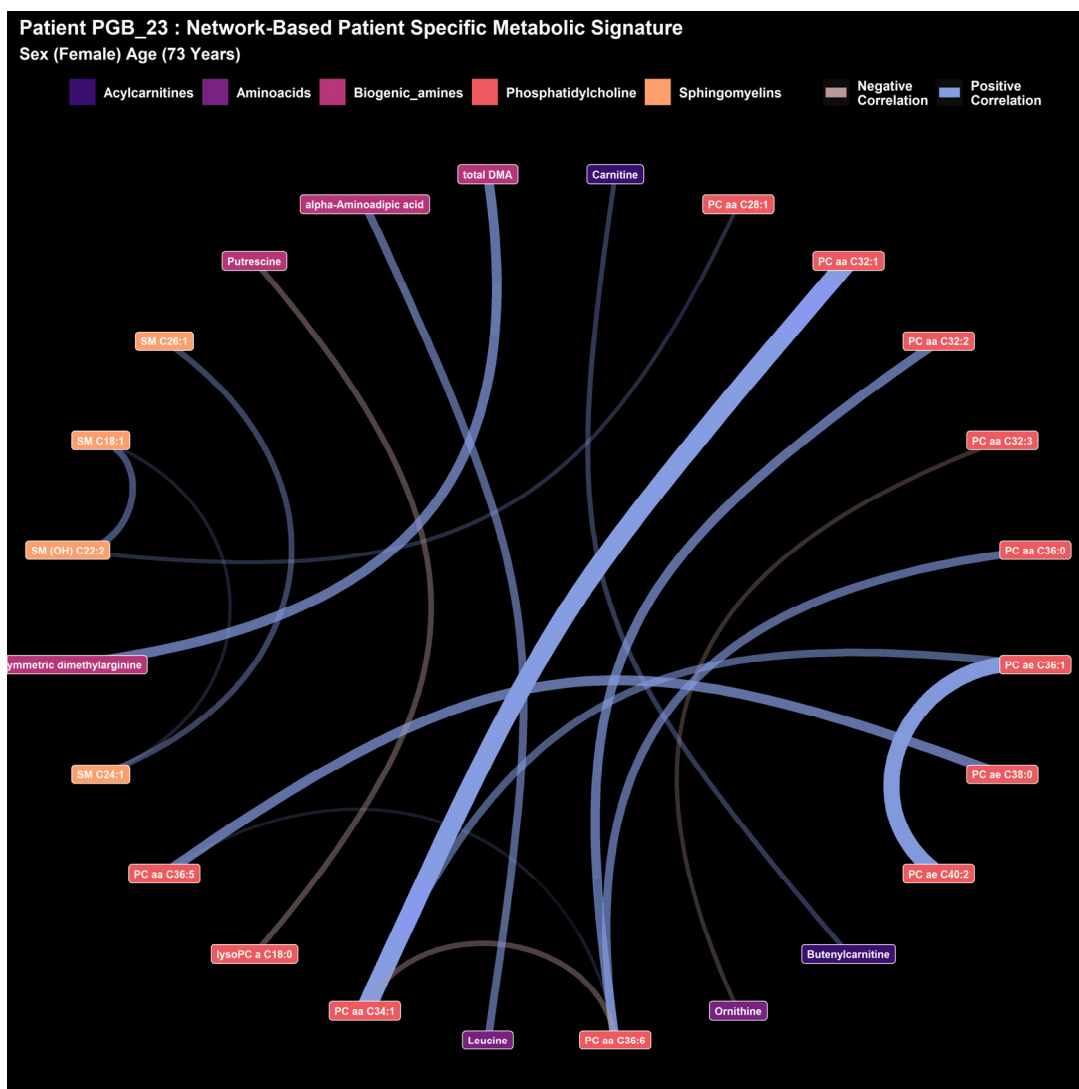

**Figure S30.** Network-based patient specific plasma metabolic signature (Patient PGB\_23). The signature includes 24 metabolites; 12 phosphatidylcholines, 2 aminoacids, 2 acylcarnitines, 4 biogenic amines and 4 sphingomyelins.

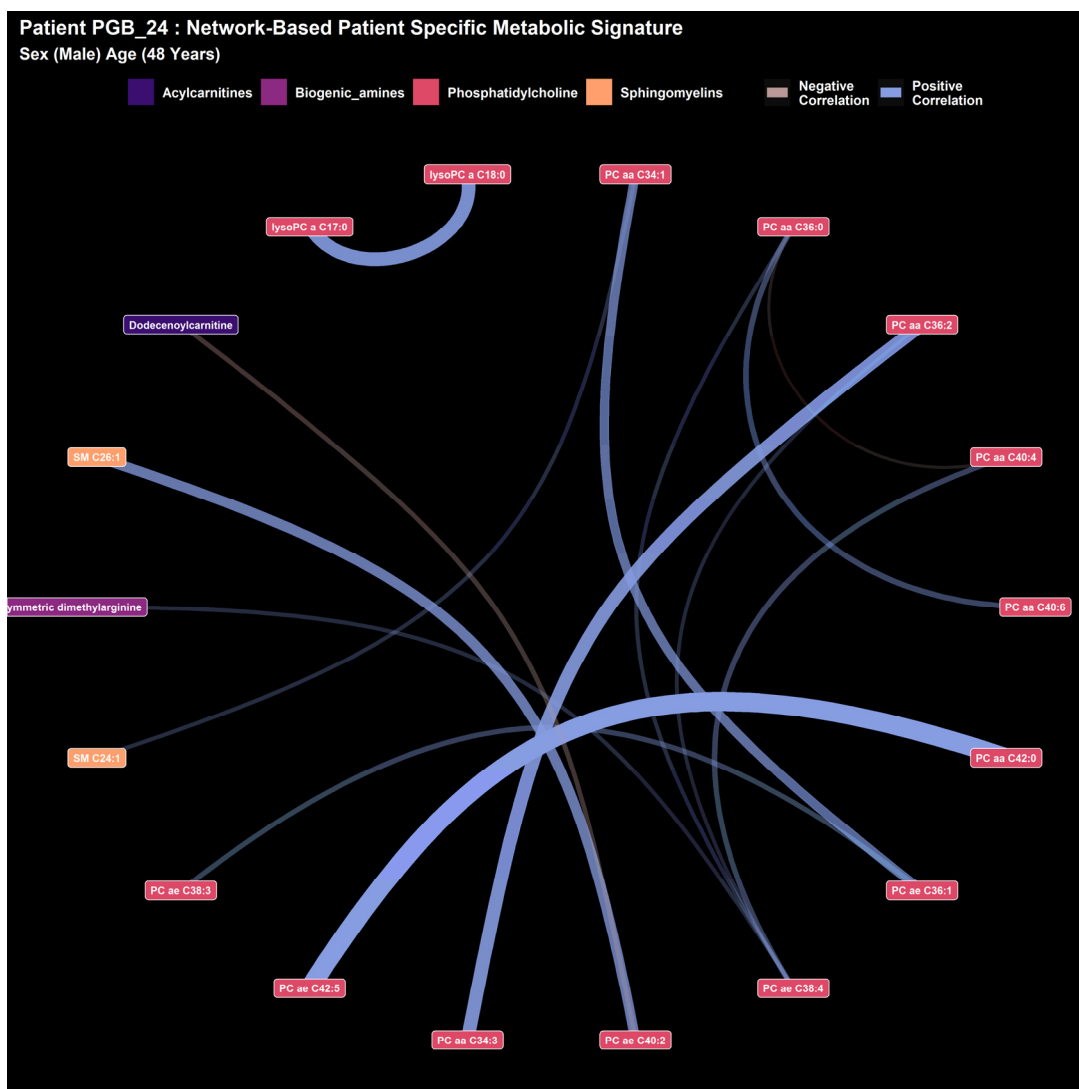

**Figure S31.** Network-based patient specific plasma metabolic signature (Patient PGB\_24). The signature includes 18 metabolites; 14 phosphatidylcholines, 1 acylcarnitine, 1 biogenic amine and 2 sphingomyelins.

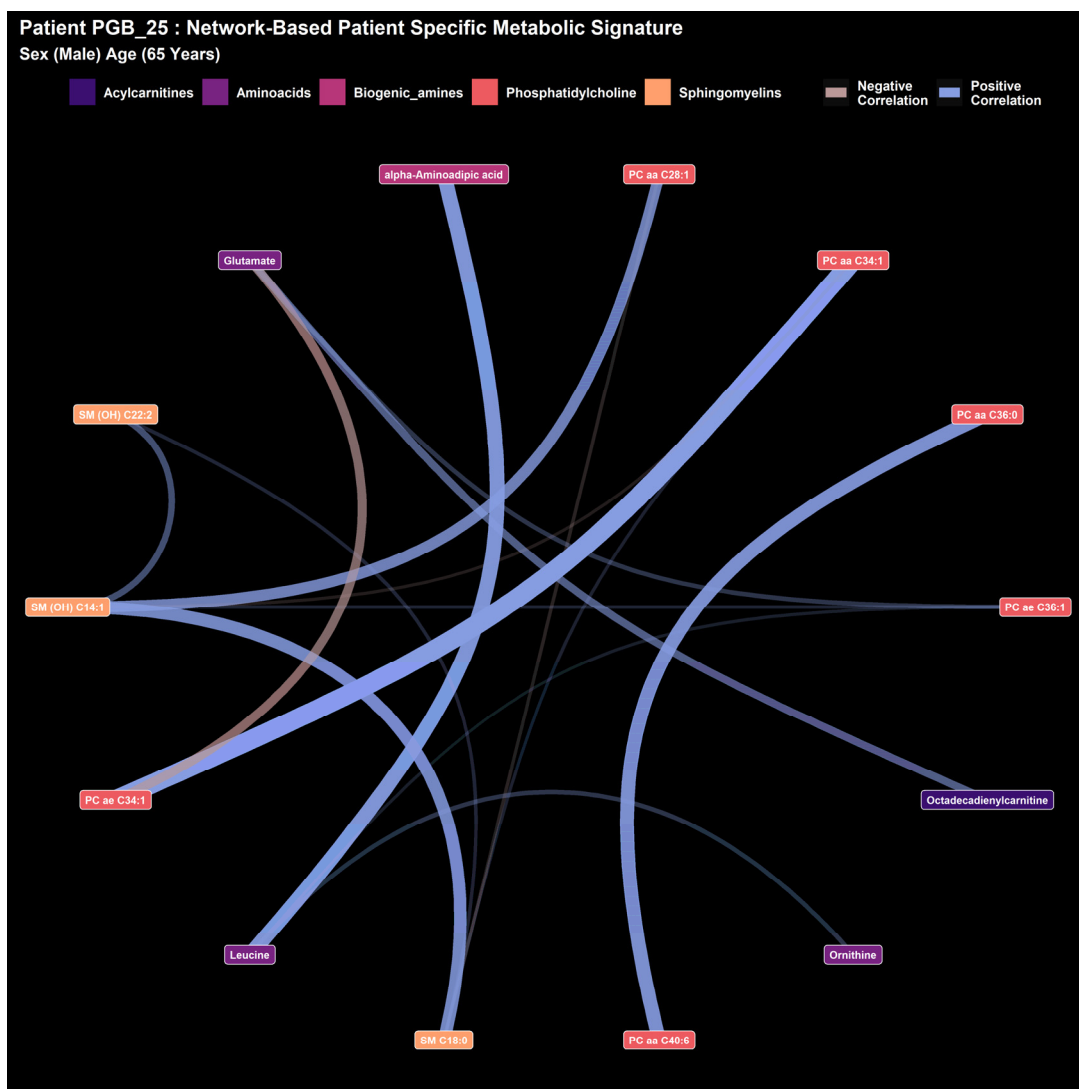

**Figure S32.** Network-based patient specific plasma metabolic signature (Patient PGB\_25). The signature includes 14 metabolites; 6 phosphatidylcholines, 3 aminoacids, 1 acylcarnitine, 1 biogenic amine and 3 sphingomyelins.

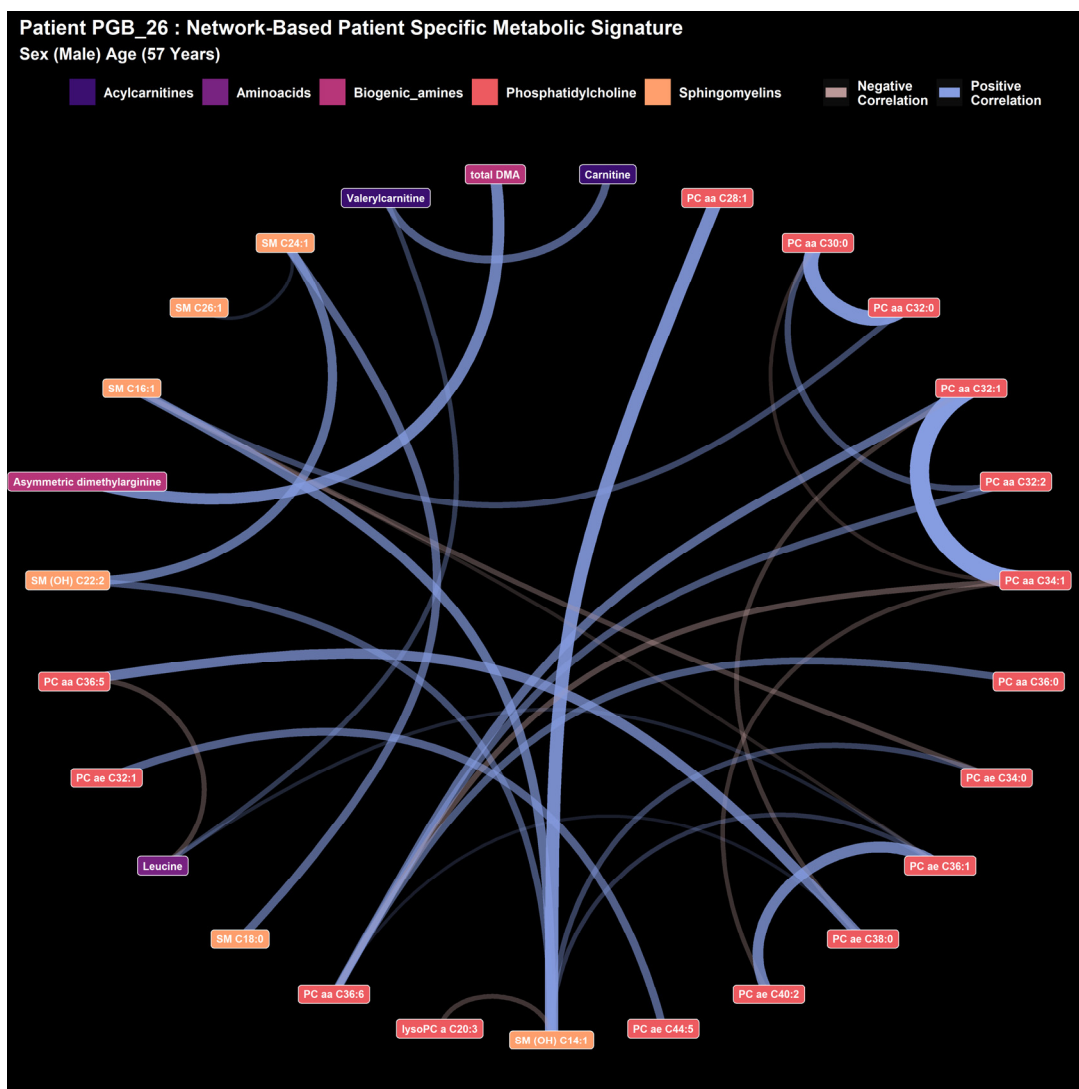

**Figure S33.** Network-based patient specific plasma metabolic signature (Patient PGB\_26). The signature includes 27 metabolites; 16 phosphatidylcholine, 1 aminoacid, 2 acylcarnitines, 2 biogenic amines and 6 sphingomyelins.

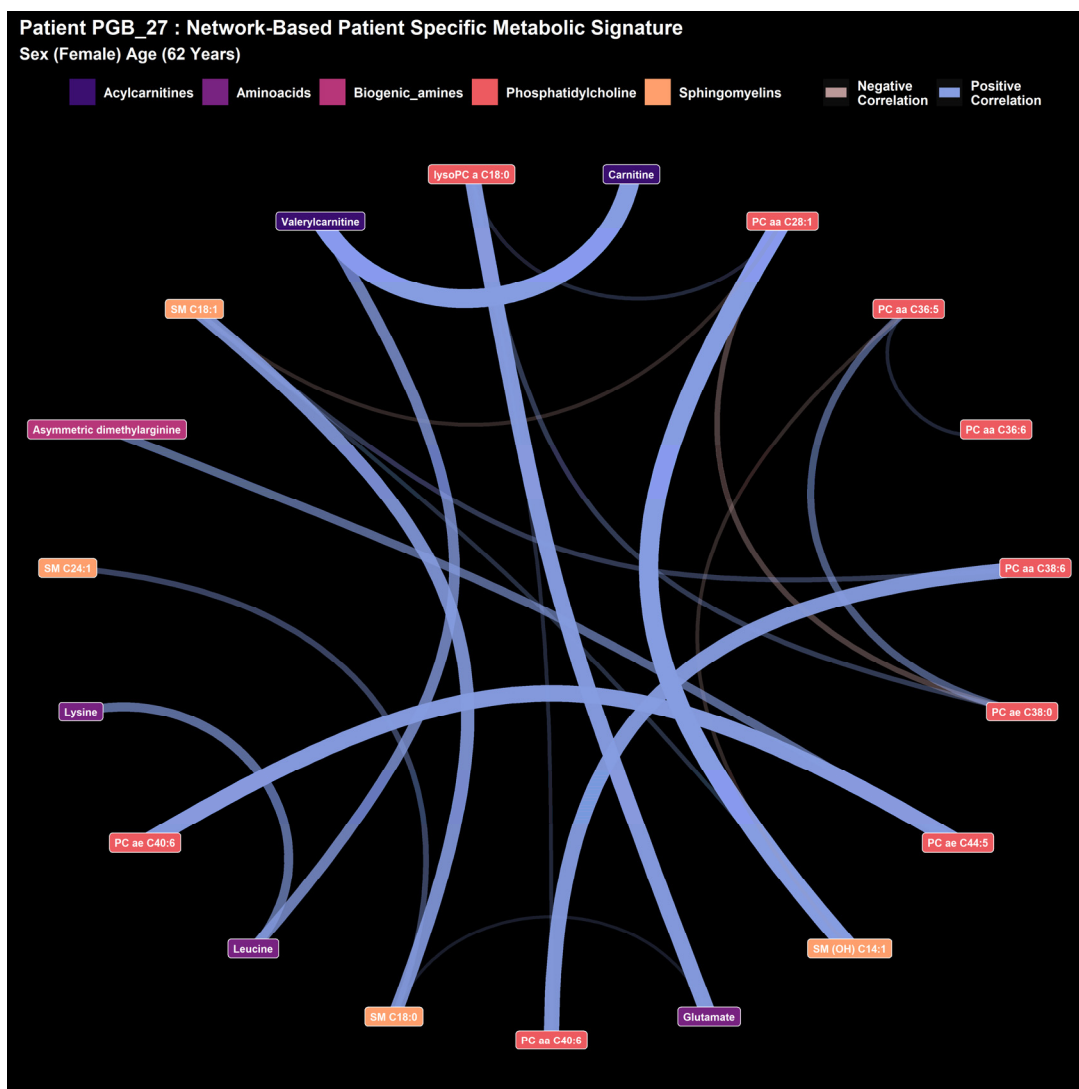

**Figure S34.** Network-based patient specific plasma metabolic signature (Patient PGB\_27). The signature includes 19 metabolites; 9 phosphatidylcholines, 3 aminoacides, 3 acylcarnitine, 1 biogenic amine and 3 sphingomyelins.

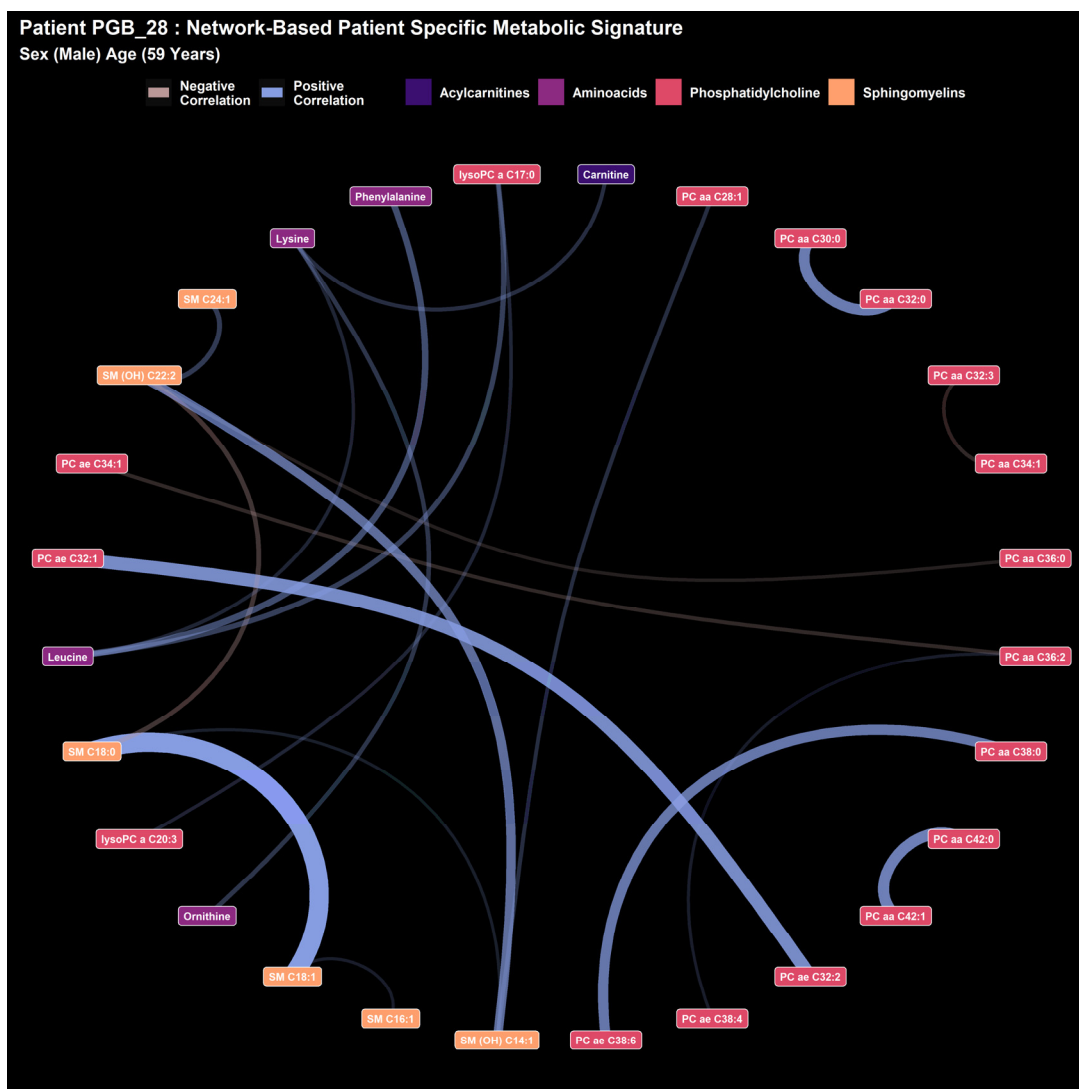

**Figure S35.** Network-based patient specific plasma metabolic signature (Patient PGB\_28). The signature includes 28 metabolites; 17 phosphatidylcholines, 4 aminoacids, 1 acylcarnitine and 6 sphingomyelins.

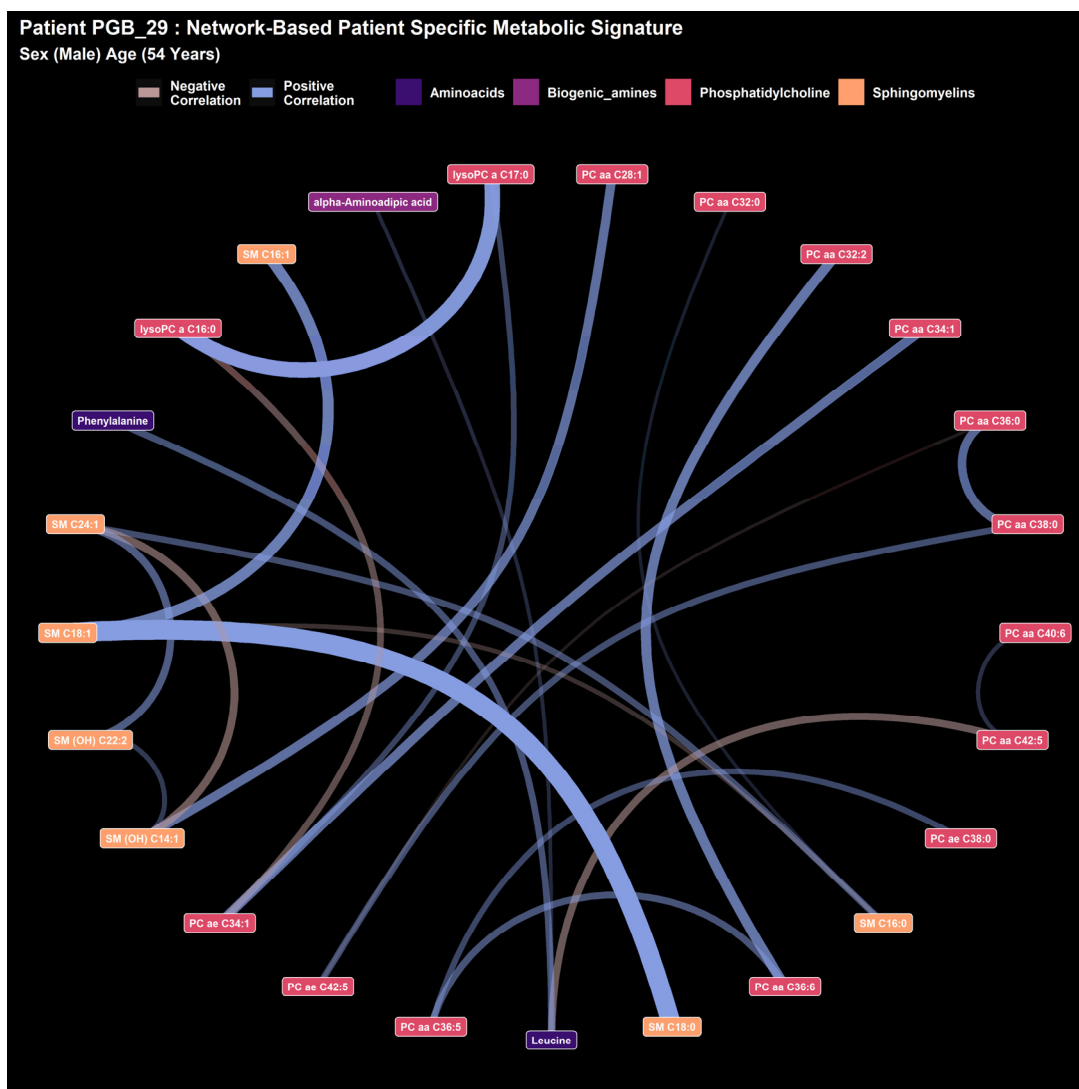

**Figure S36.** Network-based patient specific plasma metabolic signature (Patient PGB\_29). The signature includes 25 metabolites; 15 phosphatidylcholines, 2 aminoacides, 1 biogenic amine and 7 sphingomyelins.
